# Supplementary material for: NbCl3-catalyzed [2+2+2] intermolecular cycloaddition of alkynes and alkenes to 1,3-cyclohexadiene derivatives
Source: Royal Society of Chemistry journal article supplement (doi:10.1039/b820352k), 2008-12-08

## Electronic Supplementary Information

### **NbCl<sub>3</sub>-catalyzed [2+2+2] intermolecular cycloaddition of alkynes and alkenes to 1,3-cyclohexadiene derivatives**

Yasushi Obora,\* Keisuke Takeshita and Yasutaka Ishii\*

*Department of Chemistry and Material Engineering, Faculty of Chemistry, Materials and Bioengineering & High Technology Research Center, Kansai University, Suita, Osaka 564-8680, Japan. E-mail: ishii@ipcku.kansai-u.ac.jp*

#### **Experimental**

##### **General Remarks and Materials**

All reagents were purchased from commercial suppliers and used without further purification. <sup>1</sup>H (270 or 400 MHz) and <sup>13</sup>C NMR (67.5 or 100 MHz) spectra were recorded in CDCl<sub>3</sub>. Chemical shifts (δ) are reported in ppm using TMS as internal standard. A GC analysis was performed with a flame ionization detector using a 0.22 mm × 25 m capillary column (BP-5). Mass spectra were determined at an ionizing voltage of 70 eV. The yields of products were estimated from the peak areas based on the internal standard technique using GLC. <sup>1</sup>H NMR, <sup>13</sup>C NMR, HMQC, HMBC and NOESY spectra were measured with a JEOL EX-270, a JEOL AL-400, or a JEOL ECA-400 spectrometers. GC analysis was carried out using a Shimadzu GC-2010 equipped with a flame ionization detector using a 0.22 mm × 25 m capillary column (BP-5). Mass spectra (EI, GCMS) were measured with an Agilent 5973 Network Mass Selective Detector. High resolution mass spectra were measured on a Micromass GCT instrument.

Compounds **3ad**,<sup>1</sup> **3bd**,<sup>2</sup> **4ad**,<sup>3</sup> **4bd**,<sup>4</sup> **5a**,<sup>5</sup> **5b**,<sup>6</sup> **5c**<sup>7</sup> and **5d**<sup>6</sup> are known compounds and reported previously.

**3aa**:  $\delta_{\text{H}}$  (270 MHz; CDCl<sub>3</sub>, Me<sub>4</sub>Si) 0.87 (t, <sup>3</sup>*J*(H,H)= 7 Hz, 3H), 1.05 (s, 9 H), 1.09 (s, 9H), 1.12 - 1.36 (m, 4H), 1.49 - 1.59 (m, 2H), 2.04 - 2.12 (m, 2H), 2.31 (d, <sup>3</sup>*J*(H,H)= 15 Hz, 1H) and 5.69 (s, 2H);  $\delta_{\text{C}}$  (67.5 MHz; CDCl<sub>3</sub>, Me<sub>4</sub>Si) 14.2 (CH<sub>3</sub>), 22.8 (CH<sub>2</sub>), 27.8 (CH<sub>2</sub>), 28.2 (CH<sub>2</sub>), 28.5 (3C, CH<sub>3</sub>), 29.6 (3C, CH<sub>3</sub>), 29.8 (CH<sub>2</sub>), 33.2 (CH), 35.0 (C), 35.6 (C), 115.4 (CH), 115.5 (CH), 143.6 (C) and 150.3 (C);  $\nu_{\text{max}}/\text{cm}^{-1}$  2965, 2870, 1654, 1465, 1368, 1264 and 835; *m/z* (EI) 248.2504 (M<sup>+</sup>. C<sub>18</sub>H<sub>32</sub> requires 248.2504), 175 (7%), 119 (6), 91 (6), 57 (100).

**3ab**:  $\delta_{\text{H}}$  (270 MHz; CDCl<sub>3</sub>, Me<sub>4</sub>Si) 0.79 (t, <sup>3</sup>*J*(H,H)= 7 Hz, 3H), 0.98 (s, 9 H), 1.02 (s, 9H), 1.06 - 1.28 (m, 8H), 1.42 - 1.51 (m, 2H), 1.96 - 2.04 (m, 2H), 2.25 (d, <sup>3</sup>*J*(H,H)= 15 Hz, 1H) and 5.62 (s, 2H);  $\delta_{\text{C}}$  (67.5 MHz; CDCl<sub>3</sub>, Me<sub>4</sub>Si) 14.1 (CH<sub>3</sub>), 22.7 (CH<sub>2</sub>), 27.6 (CH<sub>2</sub>), 28.2 (CH<sub>2</sub>), 28.3 (CH<sub>2</sub>), 28.5 (3C, CH<sub>3</sub>), 29.5 (CH<sub>2</sub>), 29.6 (3C, CH<sub>3</sub>), 32.0 (CH), 33.3 (CH), 35.0 (C), 35.6 (C), 115.5 (CH), 115.6 (CH), 143.6 (C) and 150.2 (C);  $\nu_{\text{max}}/\text{cm}^{-1}$  2966, 2867, 1644, 1464, 1360, 1266 and 835; *m/z* (EI) 276.2820 (M<sup>+</sup>. C<sub>20</sub>H<sub>36</sub> requires 276.2817), 175 (5%), 119 (3), 91 (3), 57 (100).

**3ac**:  $\delta_{\text{H}}$  (270 MHz; CDCl<sub>3</sub>, Me<sub>4</sub>Si) 0.80 (t, <sup>3</sup>*J*(H,H)= 7 Hz, 3H), 0.98 (s, 9H), 1.02 (s, 9H), 1.11 - 1.26 1.42 - 1.51 (m, 14H), 1.96 - 2.04 (m, 2H), 2.25 (d, <sup>3</sup>*J*(H,H)= 15 Hz, 1H) and 5.62 (s, 2H);  $\delta_{\text{C}}$  (67.5 MHz; CDCl<sub>3</sub>, Me<sub>4</sub>Si) 14.1 (CH<sub>3</sub>), 22.7 (CH<sub>2</sub>), 27.6 (CH<sub>2</sub>), 28.2 (CH<sub>2</sub>), 28.3 (CH<sub>2</sub>), 28.5 (3C, CH<sub>3</sub>), 29.4 (CH<sub>2</sub>), 29.6 (3C, CH<sub>3</sub>), 29.7 (CH<sub>2</sub>), 29.8 (CH<sub>2</sub>), 32.0 (CH<sub>2</sub>), 33.3 (CH), 35.0 (C), 35.6 (C), 115.5 (CH), 115.6 (CH), 143.5 (C) and 150.2 (C);  $\nu_{\text{max}}/\text{cm}^{-1}$  2925, 2855, 1464, 1364, 1261 and 803; *m/z* (EI) 304.3122 (M<sup>+</sup>. C<sub>22</sub>H<sub>40</sub> requires 304.3130), 175 (8%), 119 (4), 91 (3), 57 (100).

**3ad:**  $\delta_{\text{H}}$  (270 MHz;  $\text{CDCl}_3$ ,  $\text{Me}_4\text{Si}$ ) 1.00 (s, 18 H), 2.04 (s, 4H) and 5.65 (s, 2H);  $\delta_{\text{C}}$  (67.5 MHz;  $\text{CDCl}_3$ ,  $\text{Me}_4\text{Si}$ ) 24.6 (2C,  $\text{CH}_2$ ), 28.7 (6C,  $\text{CH}_3$ ), 35.2 (2C, C), 115.6 (2C, CH), 146.2 (2C, C).

**3ae:**  $\delta_{\text{H}}$  (270 MHz;  $\text{CDCl}_3$ ,  $\text{Me}_4\text{Si}$ ) 0.72 (t,  $^3J(\text{H,H})=7$  Hz, 3H), 0.85 (s, 3H), 0.86 (s, 3 H), 0.99 (s, 9H), 1.04 (s, 9H), 1.11 - 1.24 (m, 4H), 1.69 (dd,  $^3J(\text{H,H})=15, 10$  Hz, 1H), 2.04 - 2.10 (m, 1H), 2.30 - 2.37 (m, 1H) and 5.64 (s, 2H);  $\delta_{\text{C}}$  (67.5 MHz;  $\text{CDCl}_3$ ,  $\text{Me}_4\text{Si}$ ) 8.4 ( $\text{CH}_3$ ), 26.9 ( $\text{CH}_3$ ), 27.1 ( $\text{CH}_3$ ), 28.8 (3C,  $\text{CH}_3$ ), 28.9 (CH), 30.0 (3C,  $\text{CH}_3$ ), 31.3 ( $\text{CH}_2$ ), 34.0 (C), 35.1 (C), 35.8 (C), 36.9 ( $\text{CH}_2$ ), 38.0 ( $\text{CH}_2$ ), 116.2 (CH), 116.3 (CH), 143.9 (C) and 150.5 (C);  $\nu_{\text{max}}/\text{cm}^{-1}$  2967, 2870, 1740, 1464, 1364, 1254 and 834;  $m/z$  (EI) 276.2814 ( $\text{M}^+$ .  $\text{C}_{20}\text{H}_{36}$  requires 276.2817), 175 (3%), 119 (3), 91 (3), 57 (100).

**3af:**  $\delta_{\text{H}}$  (270 MHz;  $\text{CDCl}_3$ ,  $\text{Me}_4\text{Si}$ ) 1.02 (s, 9H), 1.20 (s, 9H), 1.99 - 2.17 (m, 2H), 2.59 - 2.67 (m, 3H), 5.77 - 5.85 (m, 2H) and 7.15 - 7.30 (m, Ph);  $\delta_{\text{C}}$  (67.5 MHz;  $\text{CDCl}_3$ ,  $\text{Me}_4\text{Si}$ ) 28.0 ( $\text{CH}_2$ ), 28.9 (3C,  $\text{CH}_3$ ), 29.8 (3C,  $\text{CH}_3$ ), 34.66 ( $\text{CH}_2$ ), 34.68 (CH), 35.2 (C), 35.9 (C), 115.9 (CH), 116.5 (CH), 125.8 128.2 129.0 141.2 (6C, Ph), 143.6 (C) and 148.4 (C);  $\nu_{\text{max}}/\text{cm}^{-1}$  2963, 2866, 1453, 1359, 1269, 837, 734 and 696;  $m/z$  (EI) 282.2341 ( $\text{M}^+$ .  $\text{C}_{21}\text{H}_{30}$  requires 282.2348), 190 (14%), 175 (12), 91 (23), 57 (100).

**3ag:**  $\delta_{\text{H}}$  (270 MHz;  $\text{CDCl}_3$ ,  $\text{Me}_4\text{Si}$ ) 0.66 (s, 9H), 0.92 (s, 9H), 2.22 (dd,  $^3J(\text{H,H})=16, 2$  Hz, 1H), 2.49 (ddd,  $^3J(\text{H,H})=16, 8, 3$  Hz, 1H), 3.48 (dd,  $^3J(\text{H,H})=8, 2$  Hz, 1H), 5.68 (dd,  $^3J(\text{H,H})=6, 3$  Hz, 1H), 6.03 (d,  $^3J(\text{H,H})=6$  Hz, 1H) and 7.00 - 7.14 (m, Ph);  $\delta_{\text{C}}$  (67.5 MHz;  $\text{CDCl}_3$ ,  $\text{Me}_4\text{Si}$ ) 27.8 (3C,  $\text{CH}_3$ ), 29.7 (3C,  $\text{CH}_3$ ), 34.6 (C), 34.8 ( $\text{CH}_2$ ), 35.7 (C), 39.3 (CH), 116.0 (CH), 118.7 (CH), 125.7 127.6 128.0 142.8 (6C, Ph), 142.5 (C) and 146.6 (C);  $\nu_{\text{max}}/\text{cm}^{-1}$  3058, 2965, 2905, 1463, 1361, 1258, 840, 760 and 700;  $m/z$  (EI) 268.2196 ( $\text{M}^+$ .  $\text{C}_{20}\text{H}_{28}$  requires 268.2191), 211 (18%), 155 (20), 91 (18), 57 (100).

**3ah:**  $\delta_{\text{H}}$  (270 MHz;  $\text{CDCl}_3$ ,  $\text{Me}_4\text{Si}$ ) 0.67 (s, 9H), 0.92 (s, 9H), 2.18 (s, 3H), 2.24 (d,  $^3J(\text{H,H})=6$  Hz, 1H), 2.47 (ddd,  $^3J(\text{H,H})=16, 8, 3$  Hz, 1H), 3.44 (d,  $^3J(\text{H,H})=7$  Hz, 1H), 5.67 (dd,  $^3J(\text{H,H})=6, 3$  Hz, 1H), 6.01 (d,  $^3J(\text{H,H})=6$  Hz, 1H) and 6.88 - 7.55 (m, Ph);  $\delta_{\text{C}}$  (67.5 MHz;  $\text{CDCl}_3$ ,  $\text{Me}_4\text{Si}$ ) 21.0 ( $\text{CH}_3$ ), 27.8 (3C,  $\text{CH}_3$ ), 29.7 (3C,  $\text{CH}_3$ ), 34.6 (C), 34.8 ( $\text{CH}_2$ ), 35.7 (C), 38.8 (CH), 115.9 (CH), 118.5 (CH), 127.8 128.3 134.9 139.4 (6C, Ph), 142.8 (C) and 146.7 (C);  $\nu_{\text{max}}/\text{cm}^{-1}$  2962, 2903, 1509, 1462, 1361, 1259 and 812;  $m/z$  (EI) 282.2349 ( $\text{M}^+$ .  $\text{C}_{21}\text{H}_{30}$  requires 282.2348), 225 (24%), 169 (30), 105 (23), 57 (100).

**3ba:**  $\delta_{\text{H}}$  (270 MHz;  $\text{CDCl}_3$ ,  $\text{Me}_4\text{Si}$ ) 0.74 (t,  $^3J(\text{H,H})=7$  Hz, 3H), 1.14 - 1.49 (m, 6H), 2.77 - 2.85 (m, 3H), 6.41 (s, 2H) and 7.15 - 7.46 (m, 2Ph);  $\delta_{\text{C}}$  (67.5 MHz;  $\text{CDCl}_3$ ,  $\text{Me}_4\text{Si}$ ) 14.0 ( $\text{CH}_3$ ), 22.8 ( $\text{CH}_2$ ), 29.5 ( $\text{CH}_2$ ), 30.1 ( $\text{CH}_2$ ), 30.2 ( $\text{CH}_2$ ), 35.0 (CH), 120.5 (CH), 121.0 (CH), 125.1 125.5 127.0 127.04 128.45 128.48 (10C, 2Ph), 134.3 (2C, C), 139.9 (C) and 141.2 (C);  $\nu_{\text{max}}/\text{cm}^{-1}$  3031, 2954, 2925, 1495, 1446, 758 and 688;  $m/z$  (EI) 288.1876 ( $\text{M}^+$ .  $\text{C}_{21}\text{H}_{30}$  requires 288.1878), 231 (100%), 216 (31), 152 (11), 96 (20).

**3bd:**  $\delta_{\text{H}}$  (270 MHz;  $\text{CDCl}_3$ ,  $\text{Me}_4\text{Si}$ ) 2.72 (s, 4H), 6.46 (s, 2H) and 7.18 - 7.45 (m, 2Ph);  $\delta_{\text{C}}$  (67.5 MHz;  $\text{CDCl}_3$ ,  $\text{Me}_4\text{Si}$ ) 26.1 (2C,  $\text{CH}_2$ ), 121.6 (2C, CH), 124.9 127.1 128.4 135.9 (12C, 2Ph) and 140.7 (2C, C).

**3ca:**  $\delta_{\text{H}}$  (270 MHz;  $\text{CDCl}_3$ ,  $\text{Me}_4\text{Si}$ ) 0.81 (t,  $^3J(\text{H,H})=7$  Hz, 3H), 0.93 - 1.48 1.64 - 1.89 (m, 28H), 2.00 - 2.15 (m, 1H), 2.34 - 2.40 (m, 1H), 2.66 - 2.68 (m, 1H) and 5.46 - 5.49 (m, 2H);  $\delta_{\text{C}}$  (67.5 MHz;  $\text{CDCl}_3$ ,  $\text{Me}_4\text{Si}$ ) 14.1 ( $\text{CH}_3$ ), 22.9 ( $\text{CH}_2$ ), 26.3 ( $\text{CH}_2$ ), 26.39 ( $\text{CH}_2$ ), 26.44 ( $\text{CH}_2$ ), 26.5 ( $\text{CH}_2$ ), 26.7 ( $\text{CH}_2$ ), 26.8 ( $\text{CH}_2$ ), 27.0 ( $\text{CH}_2$ ), 27.2 ( $\text{CH}_2$ ), 27.3 ( $\text{CH}_2$ ), 29.1 ( $\text{CH}_2$ ), 29.6 ( $\text{CH}_2$ ), 30.1 ( $\text{CH}_2$ ), 31.4 ( $\text{CH}_2$ ), 31.7 ( $\text{CH}_2$ ), 34.5 ( $\text{CH}_2$ ), 34.6 ( $\text{CH}_2$ ), 34.68 ( $\text{CH}_2$ ), 34.71 ( $\text{CH}_2$ ), 34.74 ( $\text{CH}_2$ ), 35.8 (CH), 39.0 (CH), 39.3 (CH), 43.3 (CH), 44.3 (CH), 44.8 (CH), 45.1 (CH), 115.7 (CH), 116.5 (CH), 122.9 (CH), 123.8

(CH), 124.4 (CH), 125.6 (CH), 140.1 (C), 142.0 (C), 145.0 (C) and 147.7 (C);  $\nu_{\max}/\text{cm}^{-1}$  2909, 2849, 1600, 1448, 1348, 1261, 997, 908, 855, 820 and 734;  $m/z$  (EI) 300.2828 ( $\text{M}^+$ .  $\text{C}_{22}\text{H}_{36}$  requires 300.2817), 161 (25%), 91 (10), 83 (100), 55 (31).

**3da:**  $\delta_{\text{H}}$  (270 MHz;  $\text{CDCl}_3$ ,  $\text{Me}_4\text{Si}$ ) 0.81 (t,  $^3J(\text{H,H})=7$  Hz, 9H), 1.05 - 1.56 (m, 22H), 1.84 - 2.00 (m, 5H), 2.14 - 2.20 (dd,  $^3J(\text{H,H})=17, 8$  Hz, 1H), 2.45 - 2.51 (m, 1H) and 5.48 (s, 2H);  $\delta_{\text{C}}$  (67.5 MHz;  $\text{CDCl}_3$ ,  $\text{Me}_4\text{Si}$ ) 14.1 ( $\text{CH}_3$ ), 22.6 ( $\text{CH}_2$ ), 22.7 ( $\text{CH}_2$ ), 22.9 ( $\text{CH}_2$ ), 27.7 ( $\text{CH}_2$ ), 28.6 ( $\text{CH}_2$ ), 28.9 ( $\text{CH}_2$ ), 29.07 ( $\text{CH}_2$ ), 29.14 ( $\text{CH}_2$ ), 29.2 ( $\text{CH}_2$ ), 29.43 ( $\text{CH}_2$ ), 29.46 ( $\text{CH}_2$ ), 29.52 ( $\text{CH}_2$ ), 29.7 ( $\text{CH}_2$ ), 31.4 ( $\text{CH}_2$ ), 31.6 ( $\text{CH}_2$ ), 31.77 ( $\text{CH}_2$ ), 31.84 ( $\text{CH}_2$ ), 32.4 ( $\text{CH}_2$ ), 32.6 ( $\text{CH}_2$ ), 32.8 ( $\text{CH}_2$ ), 35.2 ( $\text{CH}_2$ ), 35.6 ( $\text{CH}_2$ ), 36.0 ( $\text{CH}_2$ ), 36.5 (CH), 37.3 ( $\text{CH}_2$ ), 118.0 (CH), 118.4 (CH), 125.7 (CH), 125.8 (CH), 128.9 (CH), 129.2 (CH), 130.4 (CH), 132.4 (CH), 135.3 (C), 137.7 (C), 140.1 (C), 140.3 (C), 142.1 (C) and 142.7 (C);  $\nu_{\max}/\text{cm}^{-1}$  2927, 2856, 1716, 1598, 1466, 1378 and 722;  $m/z$  (EI) 304.3137 ( $\text{M}^+$ .  $\text{C}_{22}\text{H}_{40}$  requires 304.3130), 247 (36%), 85 (83), 57 (31), 43 (100).

**3dd:**  $\delta_{\text{H}}$  (270 MHz;  $\text{CDCl}_3$ ,  $\text{Me}_4\text{Si}$ ) 0.81 (t,  $^3J(\text{H,H})=7$  Hz, 6H), 1.20 - 1.36 (m, 16H), 1.97 (t,  $^3J(\text{H,H})=8$  Hz, 4H), 2.01 (s, 4H) and 5.52 (s, 2H);  $\delta_{\text{C}}$  (67.5 MHz;  $\text{CDCl}_3$ ,  $\text{Me}_4\text{Si}$ ) 14.1 (2C,  $\text{CH}_3$ ), 22.7 (2C,  $\text{CH}_2$ ), 27.3 (2C,  $\text{CH}_2$ ), 27.7 (2C,  $\text{CH}_2$ ), 29.1 (2C,  $\text{CH}_2$ ), 31.8 (2C,  $\text{CH}_2$ ), 37.1 (2C,  $\text{CH}_2$ ), 118.7 (2C, CH) and 137.2 (2C, C);  $\nu_{\max}/\text{cm}^{-1}$  2958, 2855, 1599, 1466, 1378 and 724;  $m/z$  (EI) 248.2509 ( $\text{M}^+$ .  $\text{C}_{18}\text{H}_{32}$  requires 248.2504), 177 (61%), 93 (100), 79 (32), 43 (36).

**4aa:**  $\delta_{\text{H}}$  (270 MHz;  $\text{CDCl}_3$ ,  $\text{Me}_4\text{Si}$ ) 0.78 - 0.85 (m, 3H), 0.97 (s, 9H), 1.00 (s, 9H), 1.19 - 1.46 (m, 6H), 1.67 - 1.76 (m, 1H), 1.97 - 2.09 (m, 2H), 5.24 - 5.25 (m, 1H) and 5.60 - 5.73 (m, 1H);  $\delta_{\text{C}}$  (67.5 MHz;  $\text{CDCl}_3$ ,  $\text{Me}_4\text{Si}$ ) 14.2 ( $\text{CH}_3$ ), 23.0 ( $\text{CH}_2$ ), 28.7 (3C,  $\text{CH}_3$ ), 29.2 (3C,  $\text{CH}_3$ ), 29.4 ( $\text{CH}_2$ ), 29.8 ( $\text{CH}_2$ ), 34.0 ( $\text{CH}_3$ ), 34.1 ( $\text{CH}_2$ ), 34.6 (CH), 35.5 (C),

115.4 (CH), 119.8 (CH), 144.2 (C) and 147.1 (C);  $m/z$  (EI) 248.2507 ( $M^+$ .  $C_{18}H_{32}$  requires 248.2504), 175 (3%), 119 (2), 91 (3), 57 (100).

**4ab:**  $\delta_H$  (270 MHz;  $CDCl_3$ ,  $Me_4Si$ ) 0.76 - 0.87 (m, 3H), 0.99 (s, 9H), 1.00 (s, 9H), 1.08 - 1.51 (m, 10H), 1.59 - 1.75 (m, 1H), 1.96 - 2.08 (m, 2H), 5.22 - 5.32 (m, 1H) and 5.71 - 5.82 (m, 1H);  $m/z$  (EI) 276.2819 ( $M^+$ .  $C_{20}H_{36}$  requires 276.2817), 175 (2%), 119 (2), 91 (2), 57 (100).

**4ac:**  $\delta_H$  (270 MHz;  $CDCl_3$ ,  $Me_4Si$ ) 0.76 - 0.85 (m, 3H), 0.99 (s, 9H), 1.00 (s, 9H), 1.06 - 1.26 1.42 - 1.51 (m, 14H), 1.61 - 1.75 (m, 1H), 1.96 - 2.11 (m, 2H), 5.19 - 5.32 (m, 1H) and 5.60 - 5.73 (m, 1H);  $m/z$  (EI) 304.3137 ( $M^+$ .  $C_{22}H_{40}$  requires 304.3130), 175 (2%), 119 (2), 91 (2), 57 (100).

**4ae:**  $\delta_H$  (270 MHz;  $CDCl_3$ ,  $Me_4Si$ ) 0.76 - 0.79 (m, 3H), 0.93 (s, 3H), 0.96 (s, 3H), 0.97 (s, 9H), 1.00 (s, 9H), 1.34 - 1.48 (m, 4H), 1.52 - 1.58 (m, 1H), 2.04 - 2.15 (m, 2H) and 5.26-5.74 (m, 2H);  $m/z$  (EI) 276.2820 ( $M^+$ .  $C_{20}H_{36}$  requires 276.2817), 175 (4%), 119 (2), 91 (3), 57 (100).

**4af:**  $\delta_H$  (270 MHz;  $CDCl_3$ ,  $Me_4Si$ ) 1.04 (s, 9H), 1.06 (s, 9H), 1.86 - 1.93 (m, 2H), 2.53 - 2.54 (m, 3H), 5.09 - 5.28 (m, 2H) and 7.04 - 7.30 (m, 5H);  $m/z$  (EI) 282.2354 ( $M^+$ .  $C_{21}H_{30}$  requires 282.2348), 190 (9%), 175 (2), 91 (17), 57 (100).

**4ag:**  $\delta_H$  (270 MHz;  $CDCl_3$ ,  $Me_4Si$ ) 0.94 (s, 9H), 1.02 (s, 9H), 2.05 - 2.13 (m, 1H), 2.28 - 2.34 (m, 1H), 3.35 - 3.42 (m, 1H), 5.39 - 5.40 (m, 1H), 5.85 (s, 1H) and 7.00 - 7.31 (m, 5H);  $m/z$  (EI) 268.2201 ( $M^+$ .  $C_{20}H_{28}$  requires 268.2191), 211 (12%), 155 (11), 91 (10), 57 (100).

**4ah:**  $\delta_H$  (270 MHz;  $CDCl_3$ ,  $Me_4Si$ ) 0.95 (s, 9H), 1.02 (s, 9H), 2.03 - 2.31 (m, 5H), 3.32 - 3.39 (m, 1H), 5.36 - 5.38 (m, 1H), 5.83 (s, 1H) and 6.88 - 7.55 (m, 4H);  $m/z$  (EI) 282.2353 ( $M^+$ .  $C_{21}H_{30}$  requires 282.2348), 225 (12%), 169 (18), 105 (12), 57 (100).

7:  $\delta_{\text{H}}$  (270 MHz;  $\text{CDCl}_3$ ,  $\text{Me}_4\text{Si}$ ) 1.08 (s, 18 H), 1.35 - 1.39 1.52 - 1.57 1.69 - 1.72 (m, 6H), 2.36 - 2.37 (m, 2H), 2.59 (d,  $^3J(\text{H,H})= 0.7$  Hz, 2H) and 5.57 (s, 2H);  $\delta_{\text{C}}$  (67.5 MHz;  $\text{CDCl}_3$ ,  $\text{Me}_4\text{Si}$ ) 30.4 (2C,  $\text{CH}_2$ ), 31.2 (6C,  $\text{CH}_3$ ), 33.6 ( $\text{CH}_2$ ), 35.1 (2C, C), 45.0 (2C, CH), 47.3 (2C, CH), 117.6 (2C, CH) and 143.3 (2C, C);  $\nu_{\text{max}}/\text{cm}^{-1}$  2956, 2907, 2868, 1466, 1360, 1244 and 843;  $m/z$  (EI) 258.2354 ( $\text{M}^+$ .  $\text{C}_{19}\text{H}_{30}$  requires 258.2348), 243 (17%), 187 (15), 175 (100), 57 (65).

## References

- 1 J. F. Outlaw, J. R. Cozort, N. Garti and S. Siegel, *J. Org. Chem.*, 1993, **48**, 4186.
- 2 N. Detzer, O. Burkhard, H. Schaffrin and W. Liptay, *Zeitschrift für Naturforschung, B: Chemical Sciences*, 1987, **42b**, 1129.
- 3 J. R. Cozort, J. F. Outlaw, A. Hawkins and S. Siegel, *J. Org. Chem.*, 1993, **48**, 4190.
- 4 G. F. Woods and I. W. Tucker, *J. Am. Chem. Soc.*, 1948, **70**, 2174.
- 5 (a) H. V. Kunzer and S. Berger, *J. Org. Chem.*, 1985, **50**, 3222.; (b) J. A. Murphy, J. Garnier, S. R. Park, F. Schoenebeck, S. Zhou and A. T. Turner, *Org. Lett.* 2008, **10**, 1227.
- 6 V. Cadierno, S. E. Garcia-Garrido and J. Gimeno, *J. Am. Chem. Soc.*, 2006, **128**, 15094.
- 7 I. P. Tsukervanik and N. G. Sidorova, *Zhurnal Obshchei Khimii*, 1937, **7**, 641.

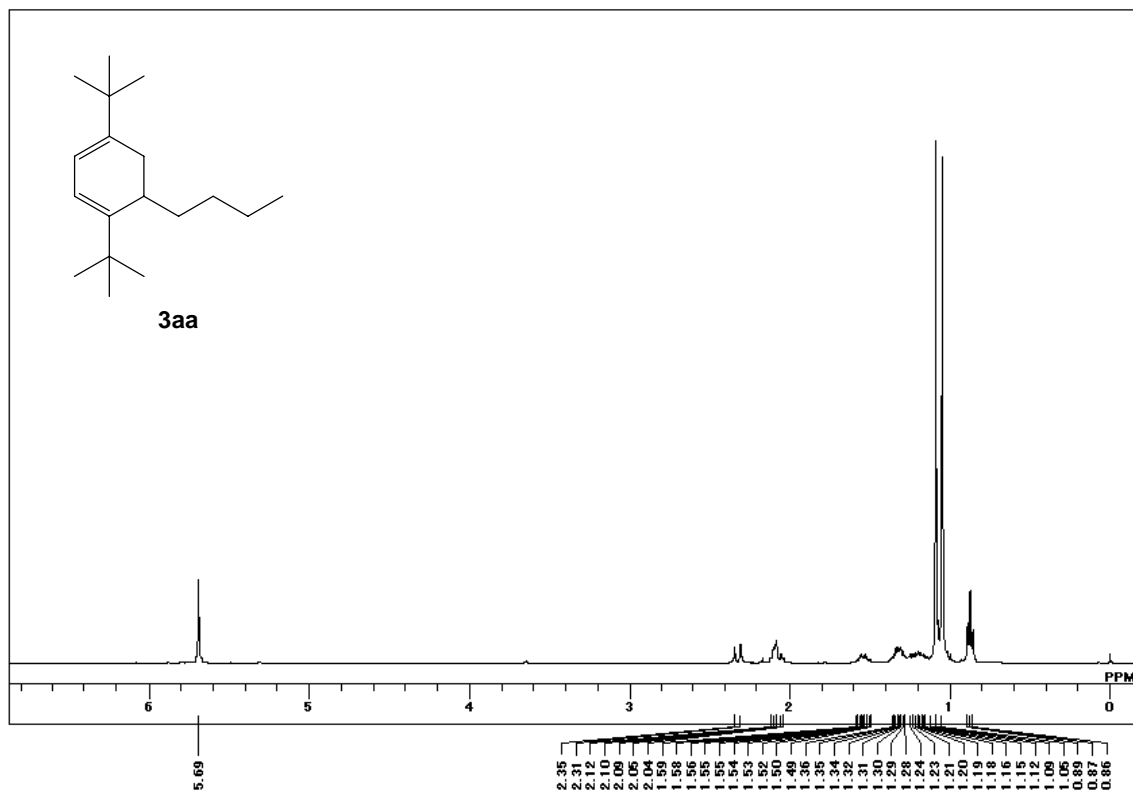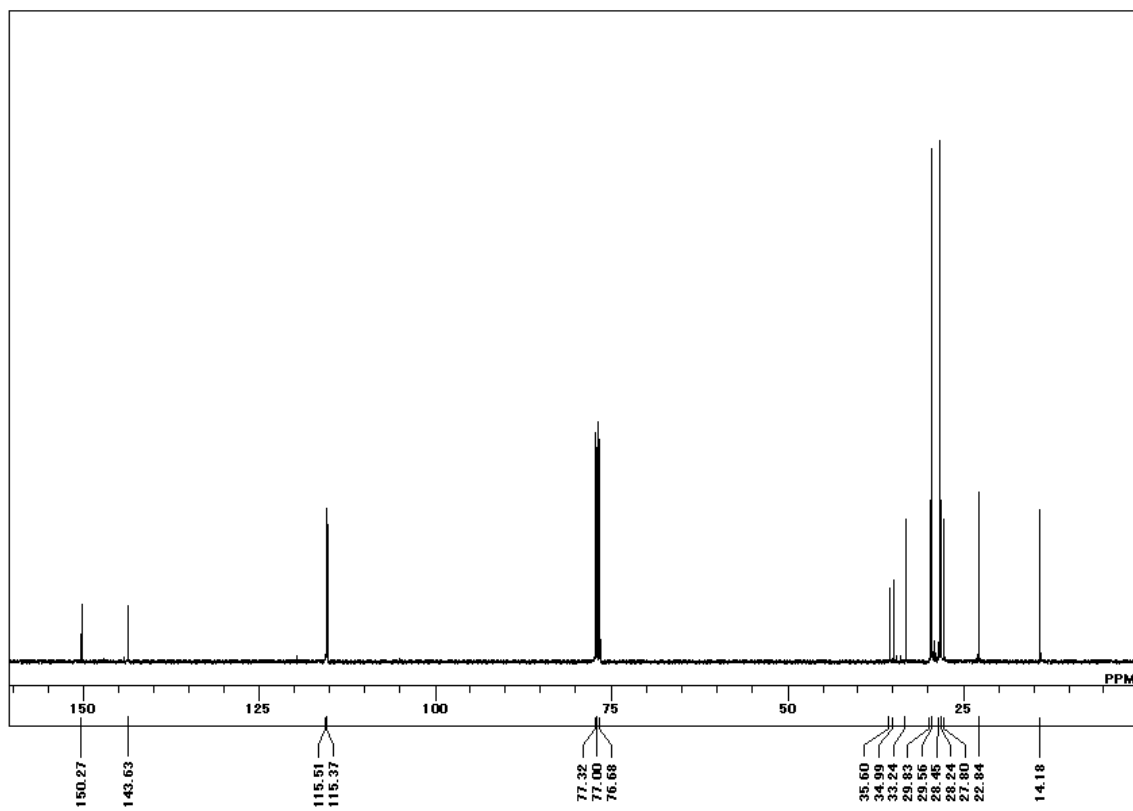



# HMQC

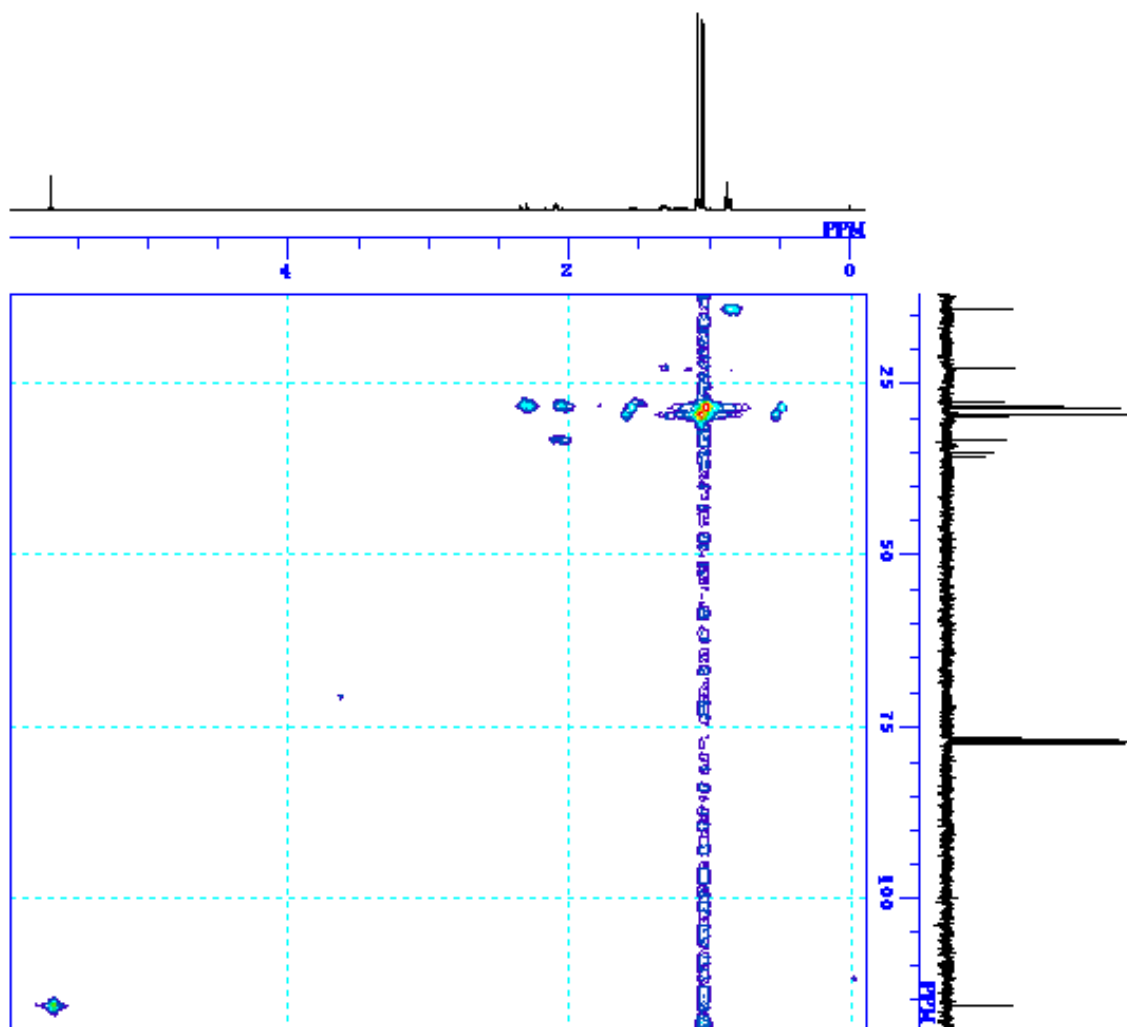

HMBC

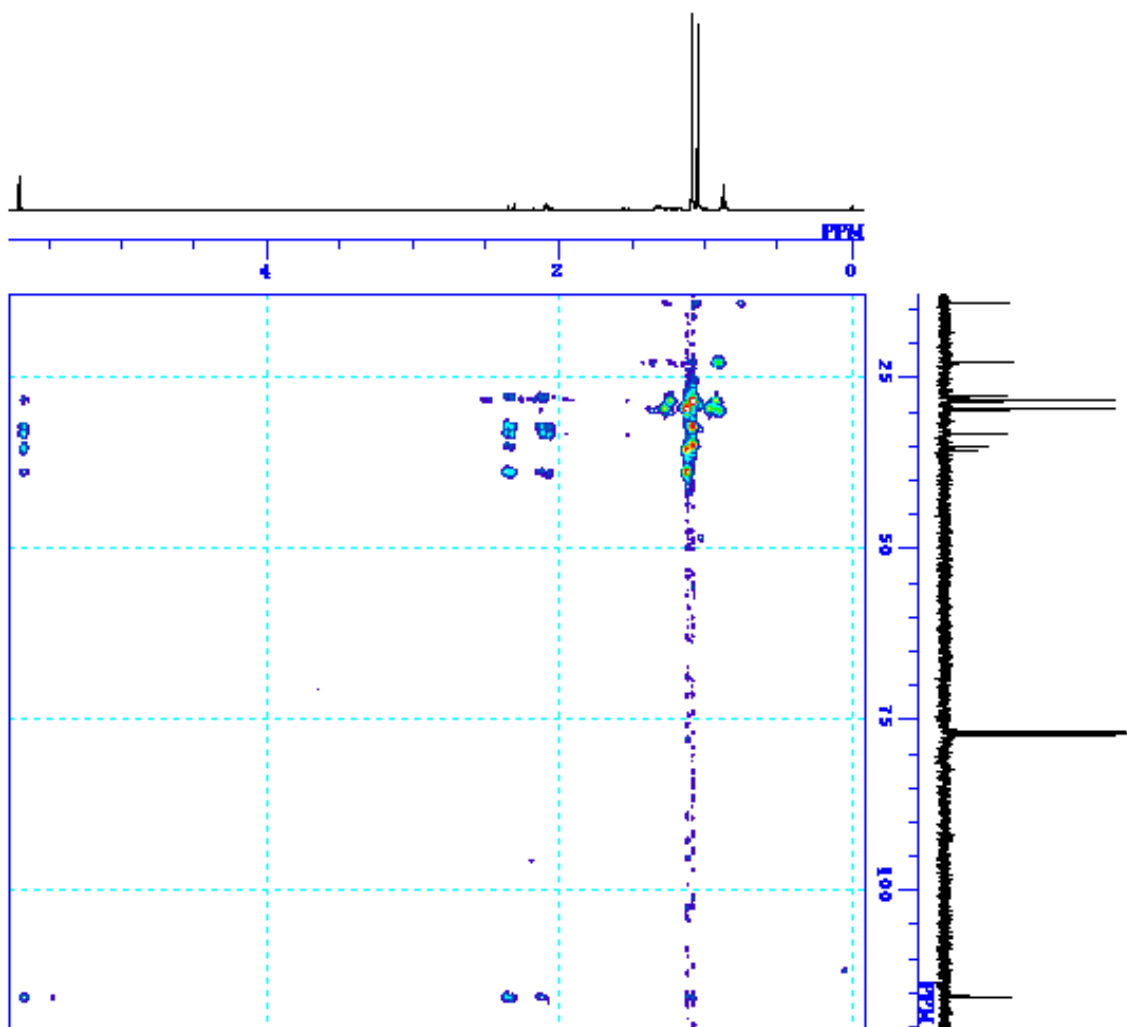

NOESY

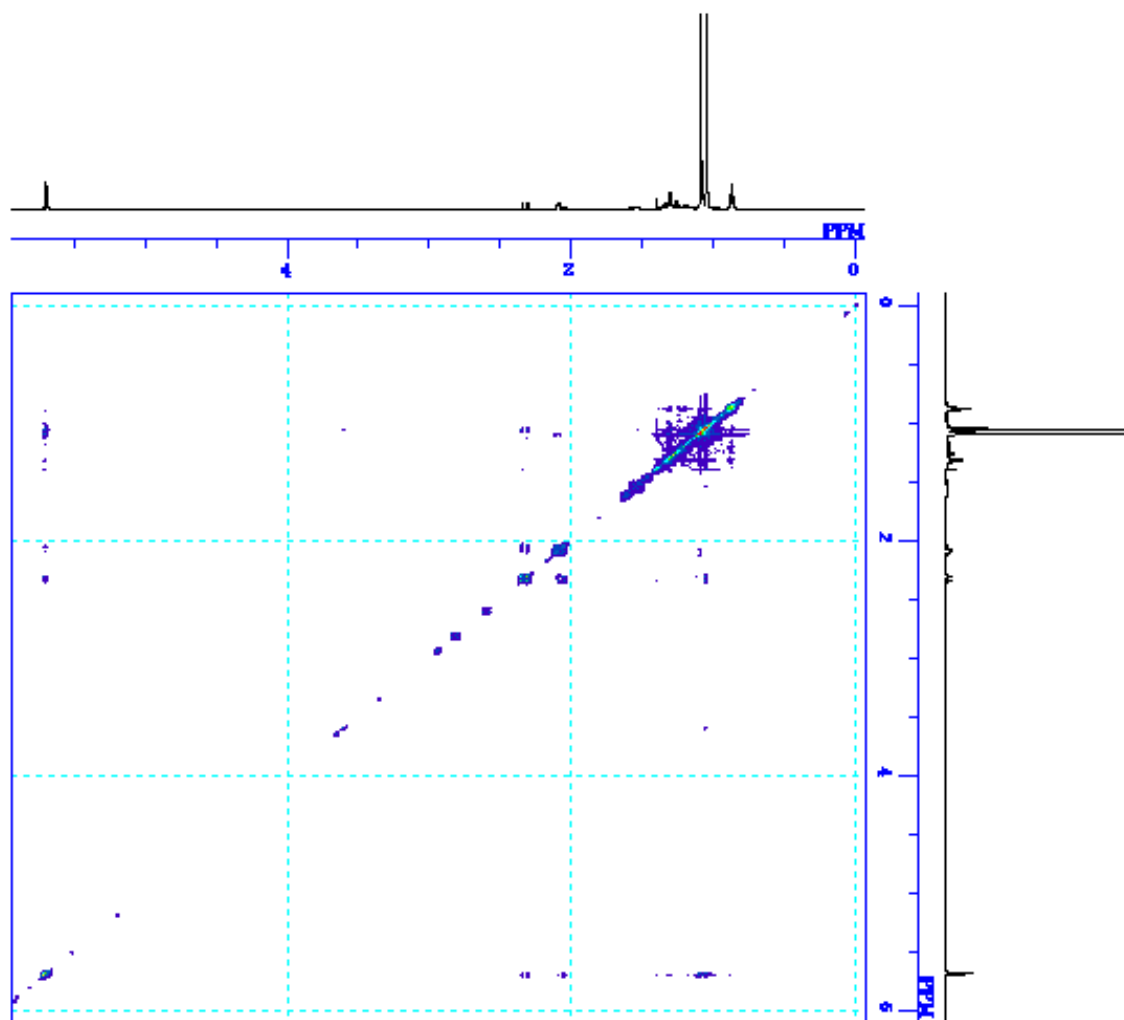

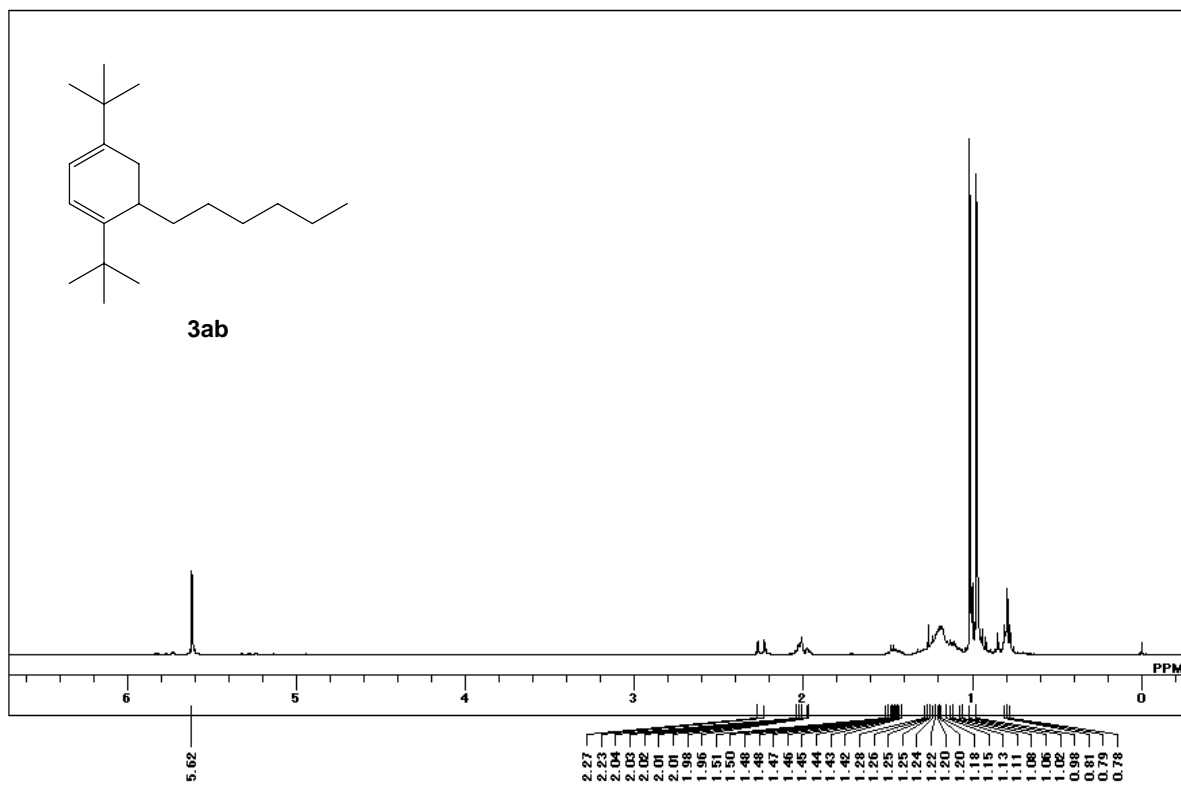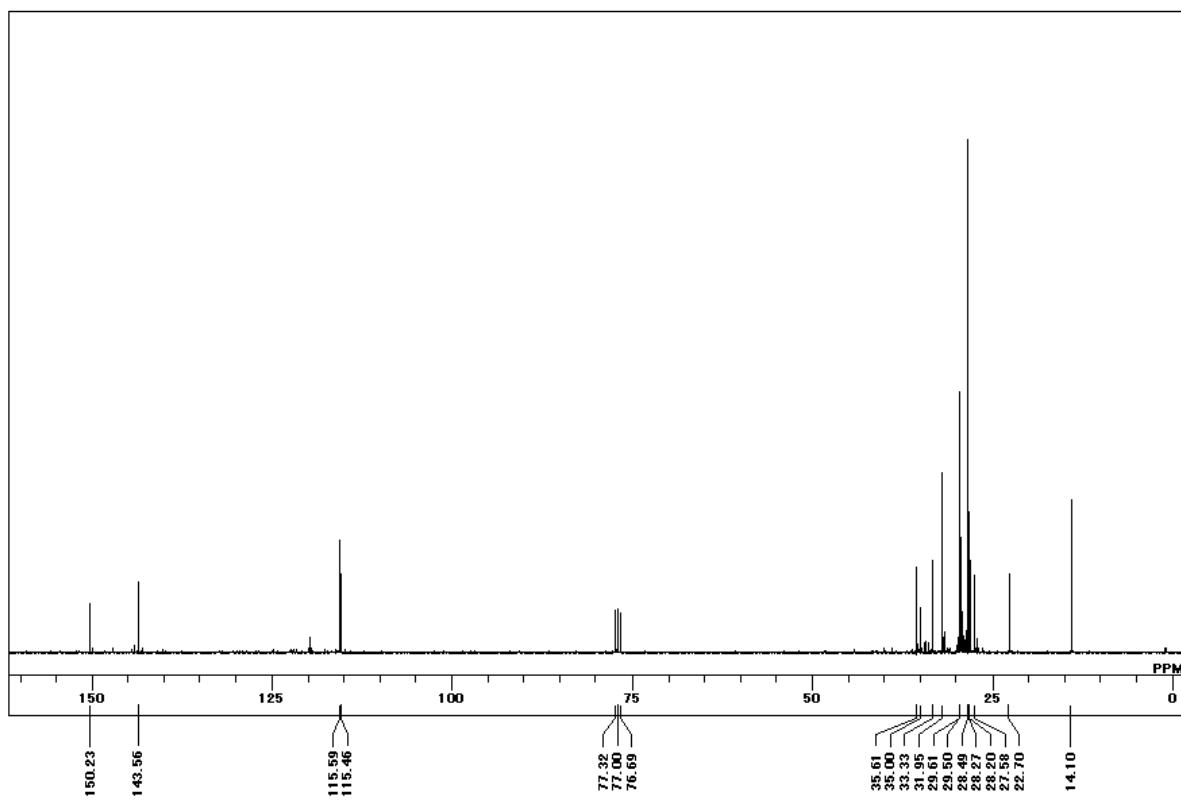

NOESY

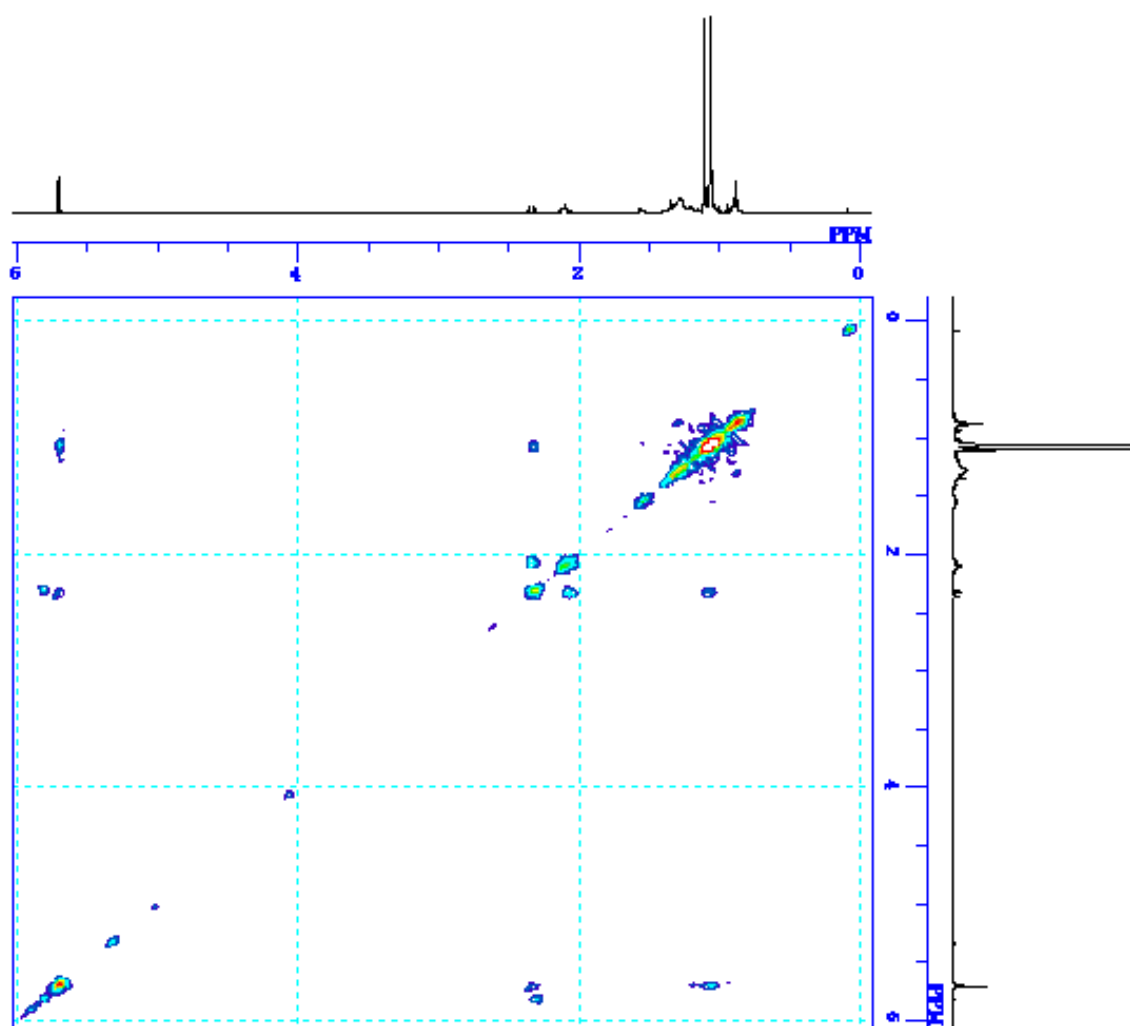

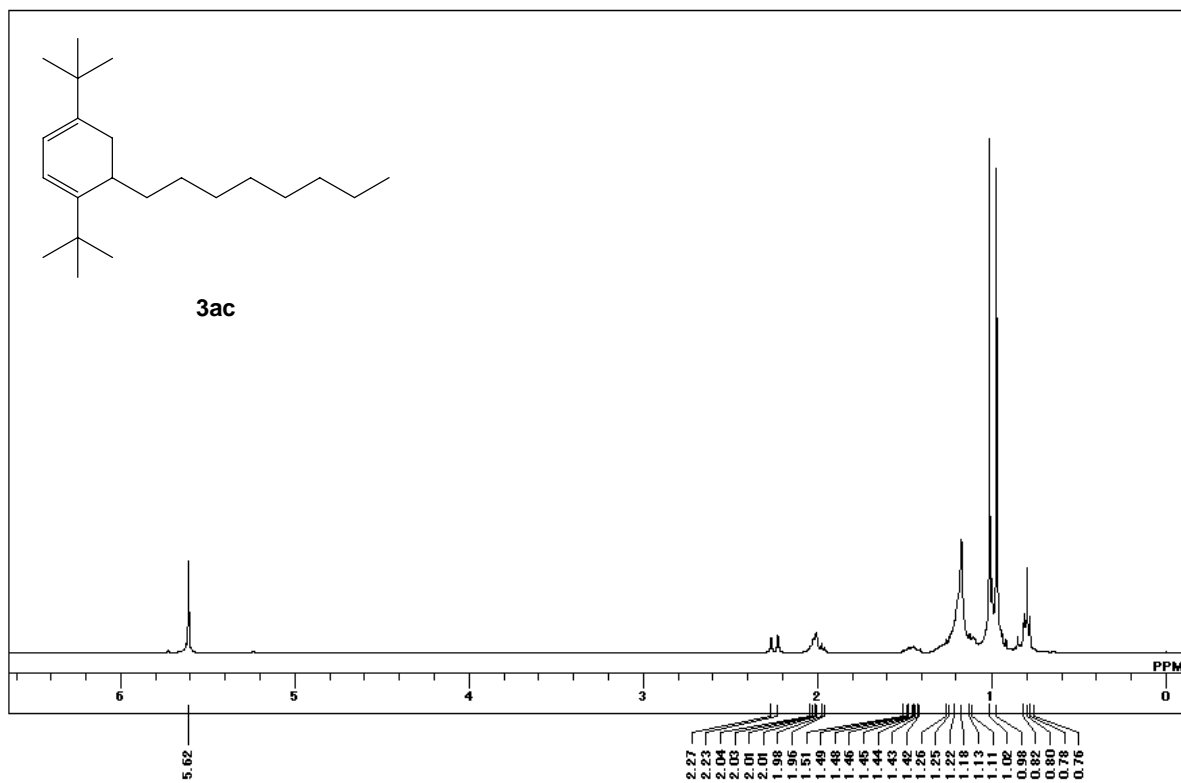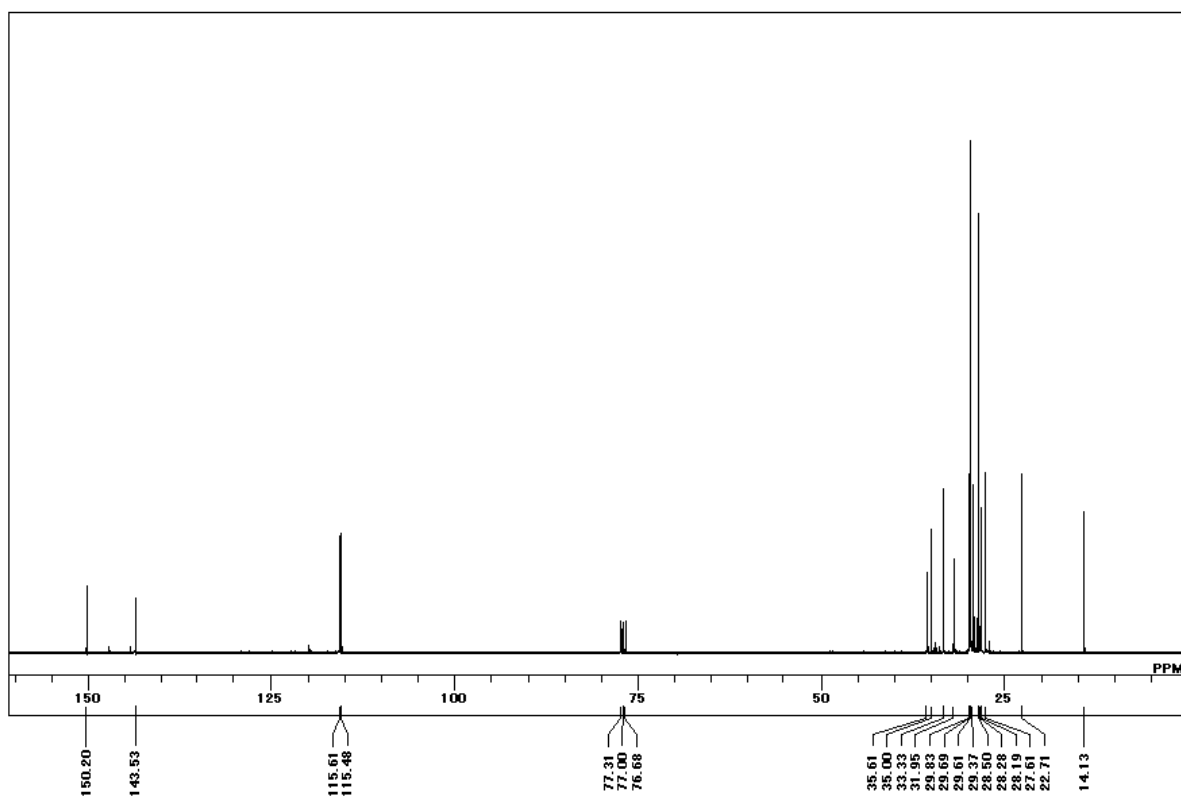

NOESY

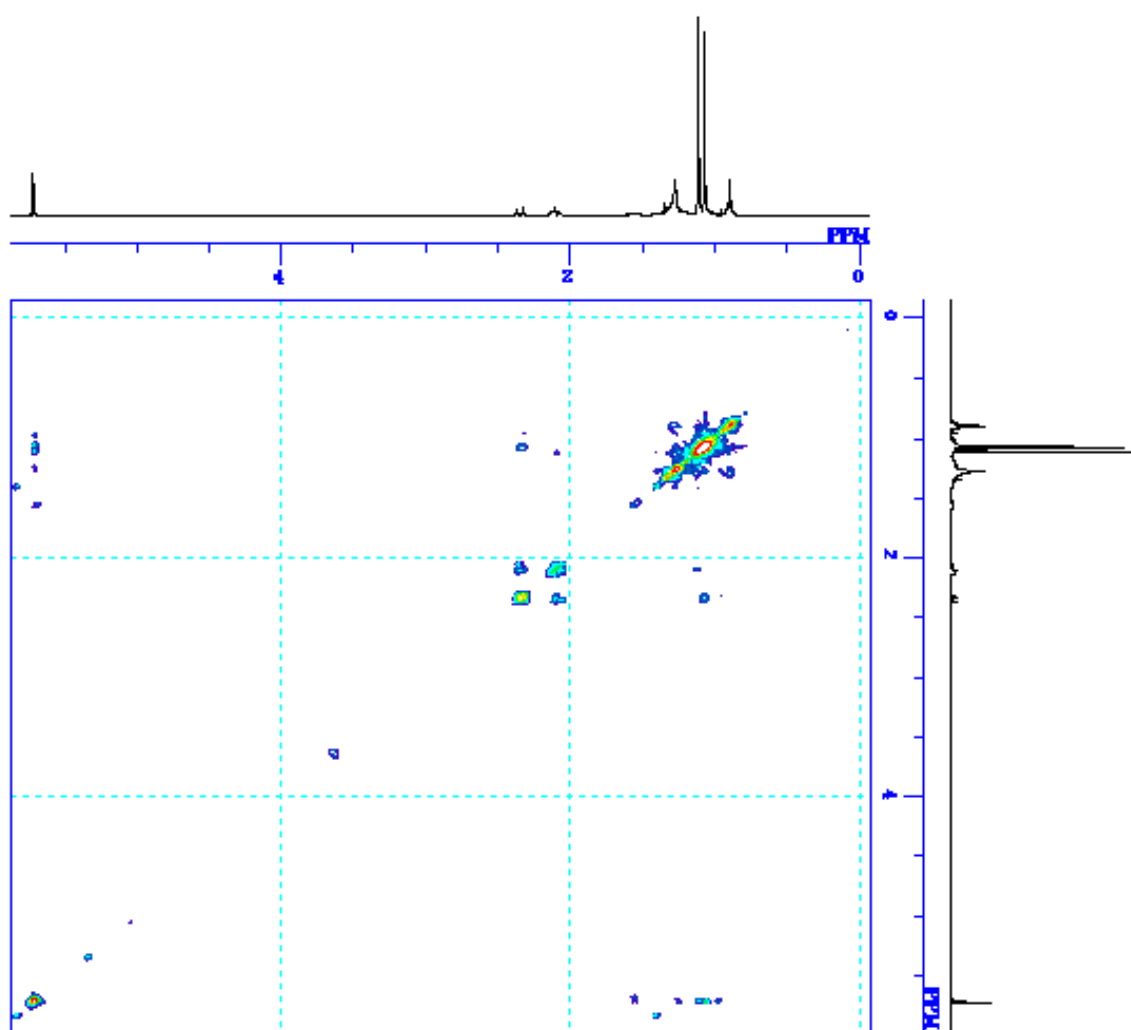

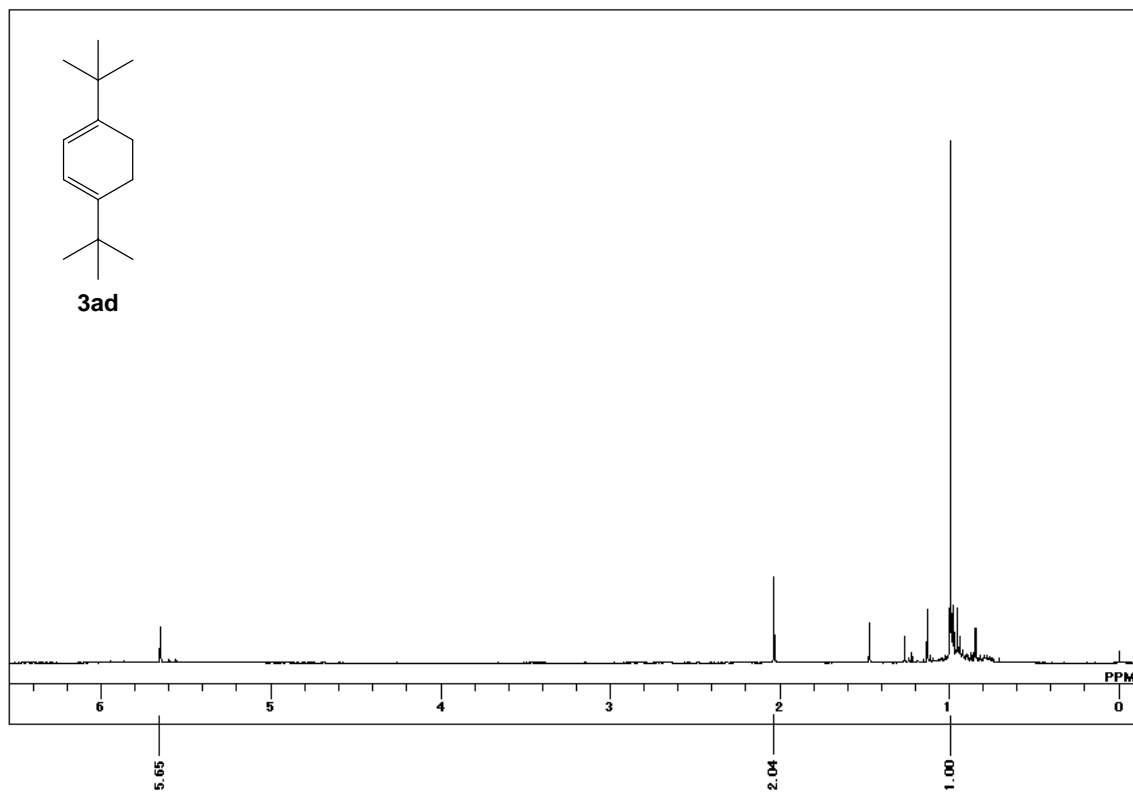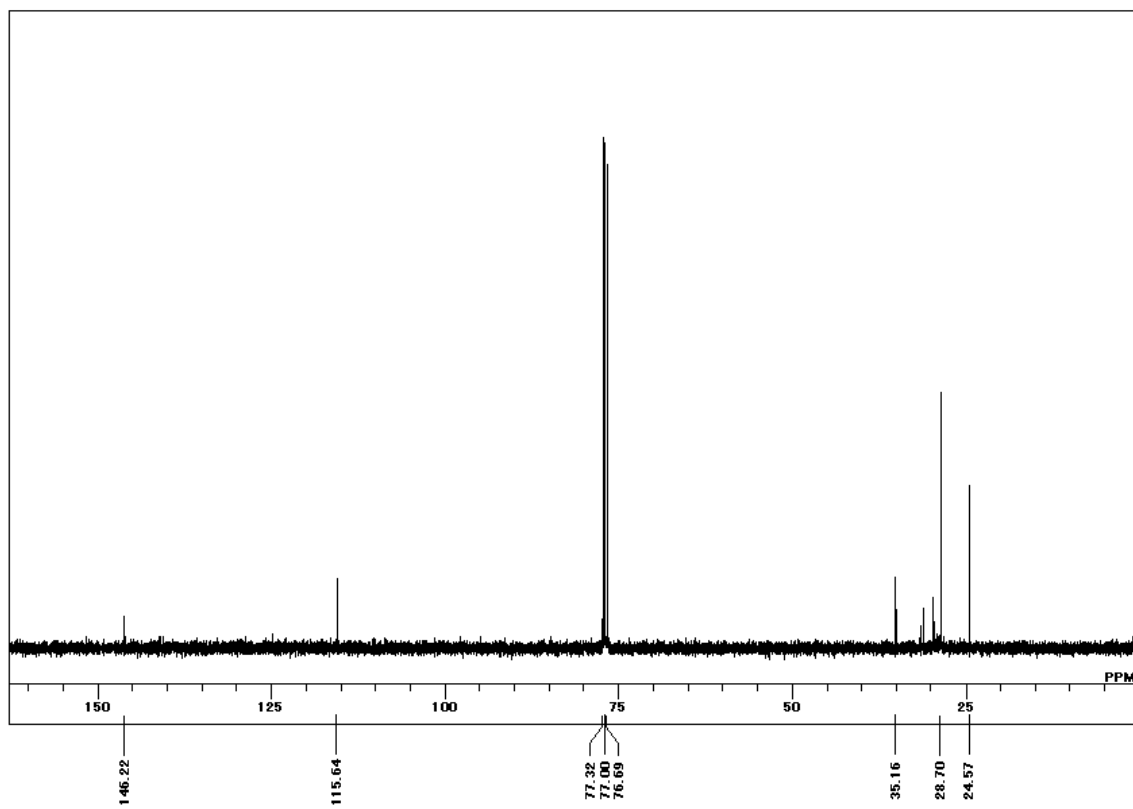



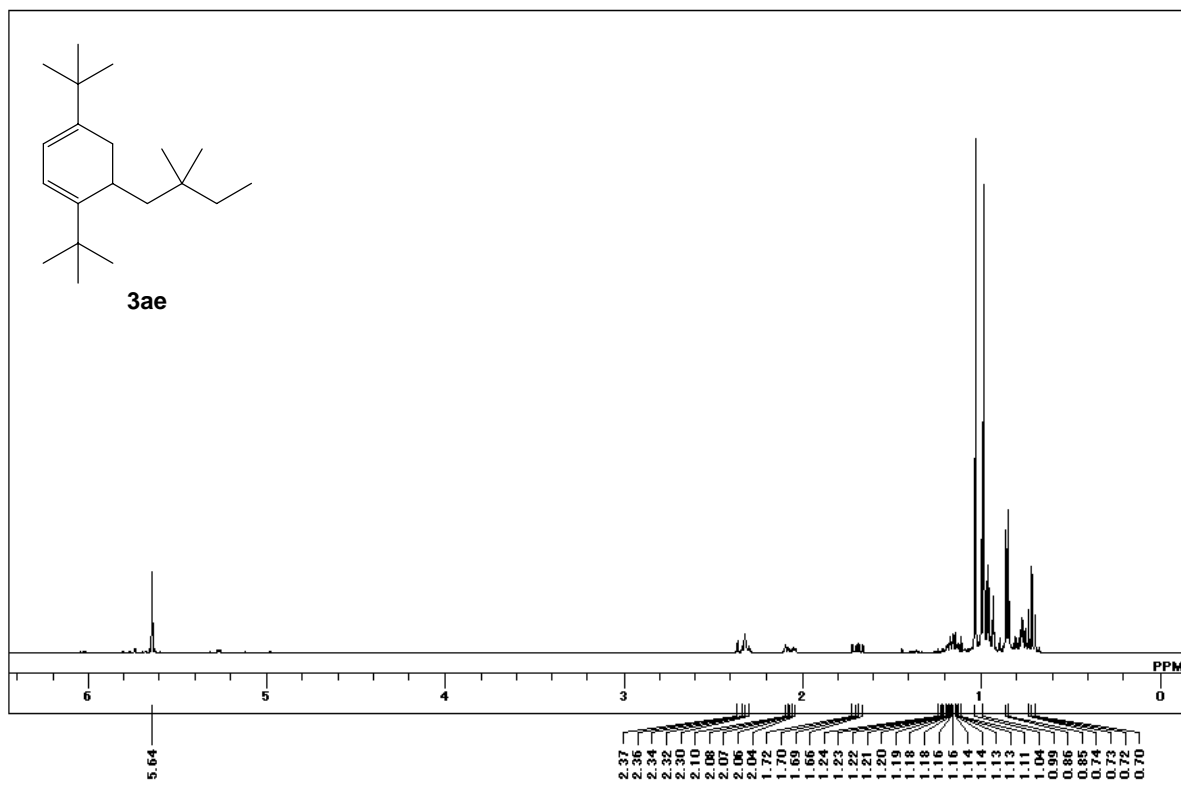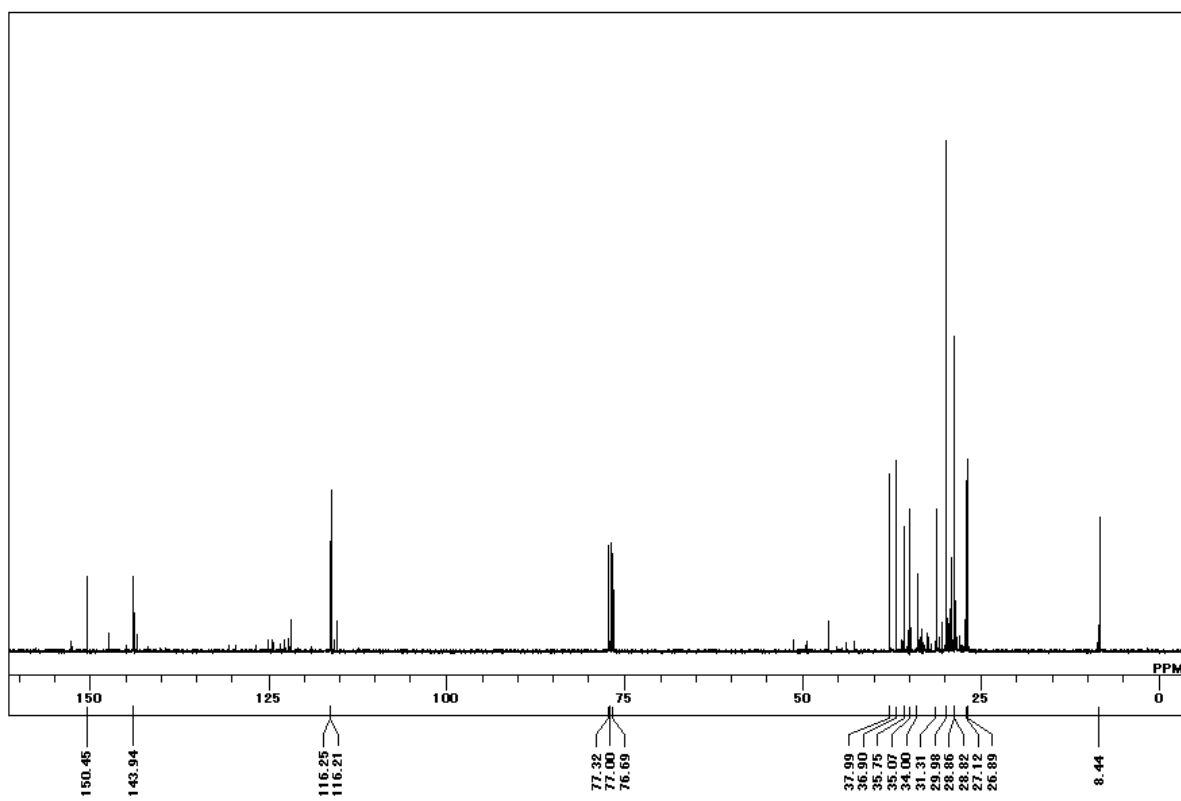

NOESY

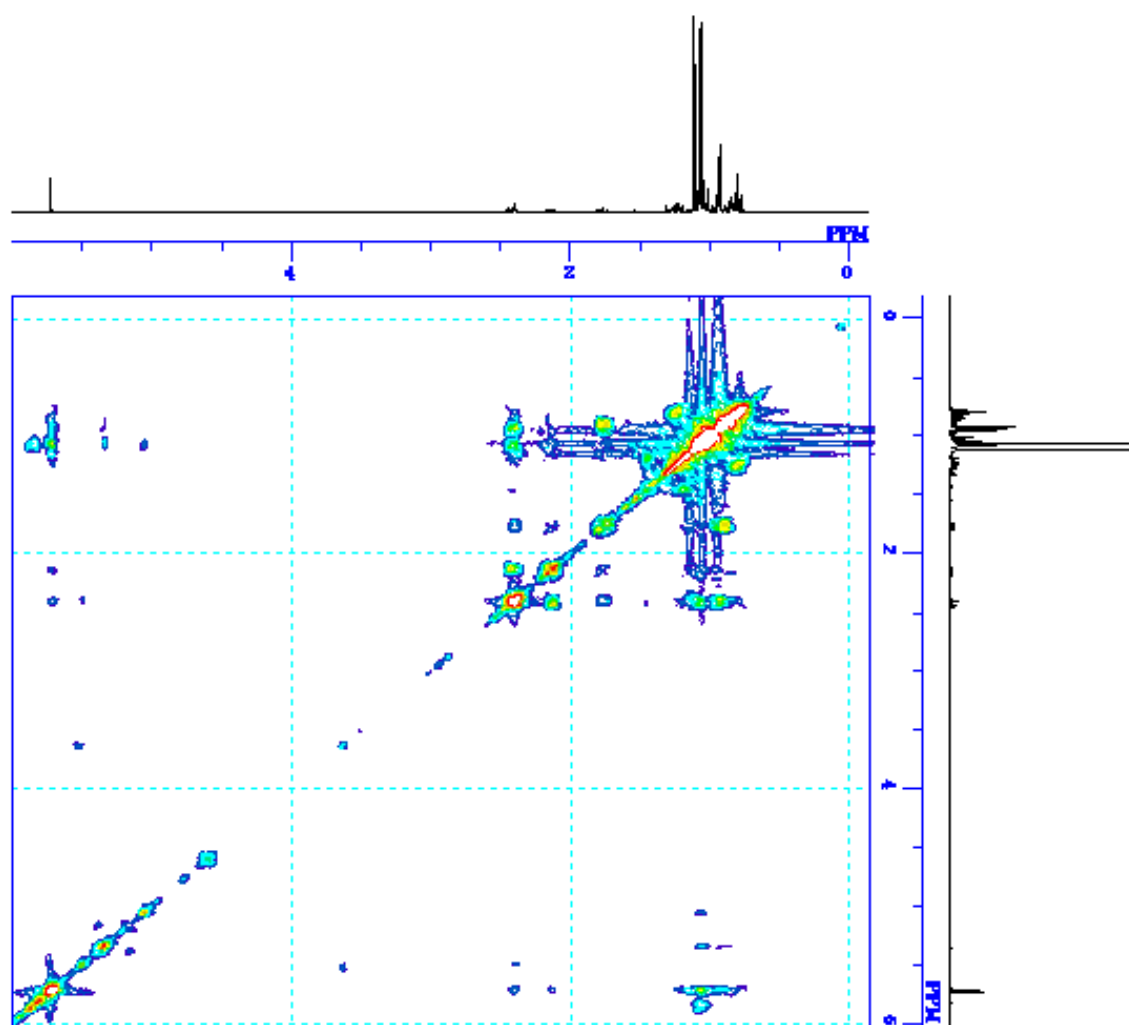

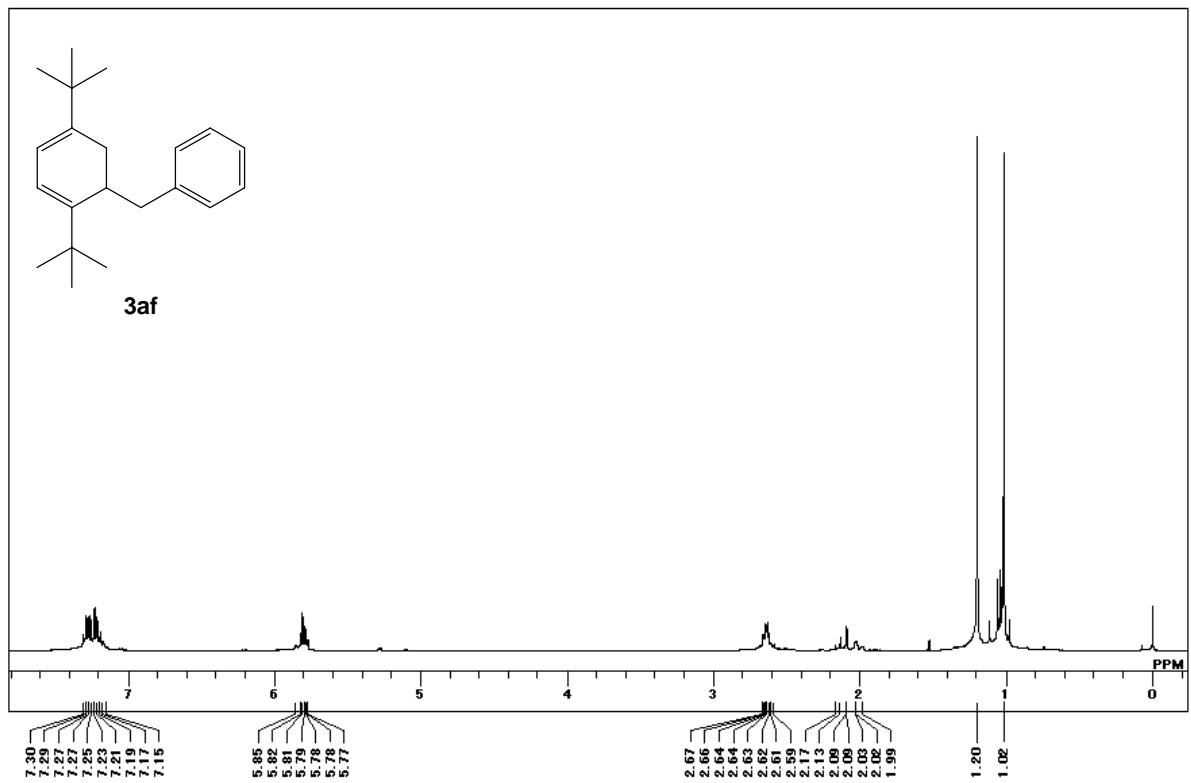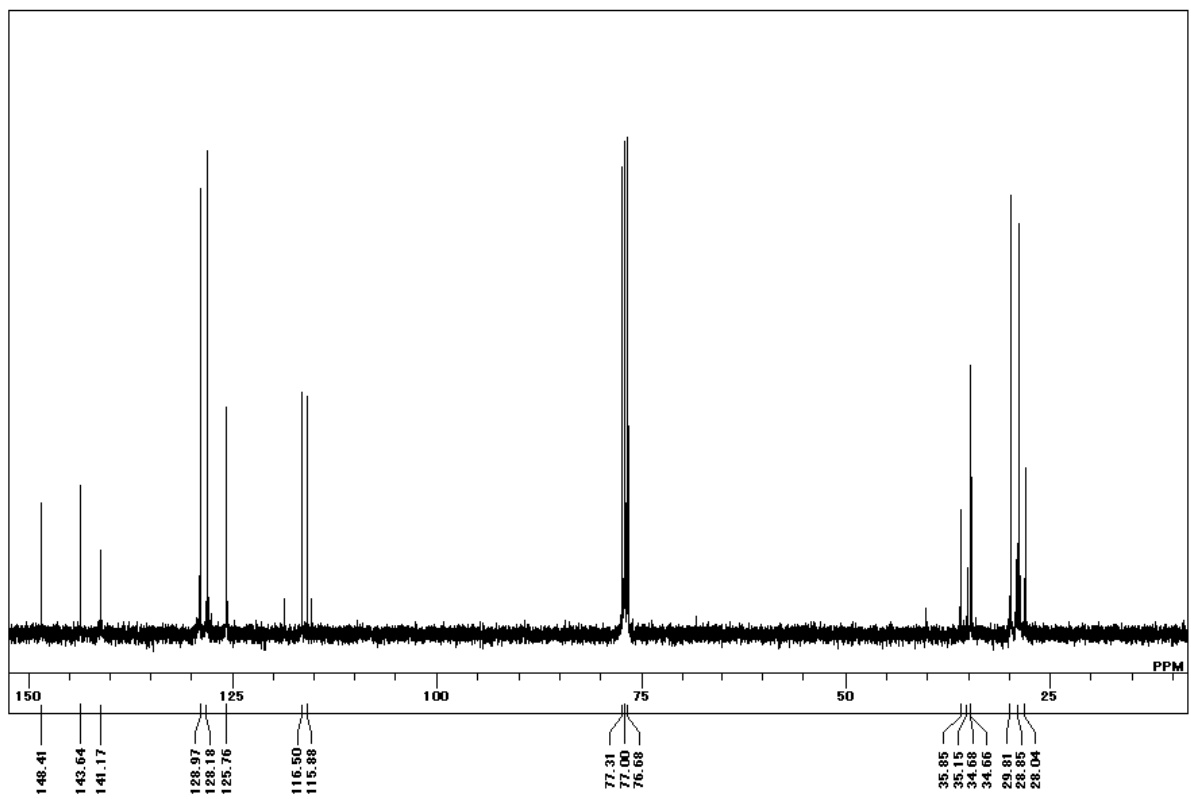

HMQC

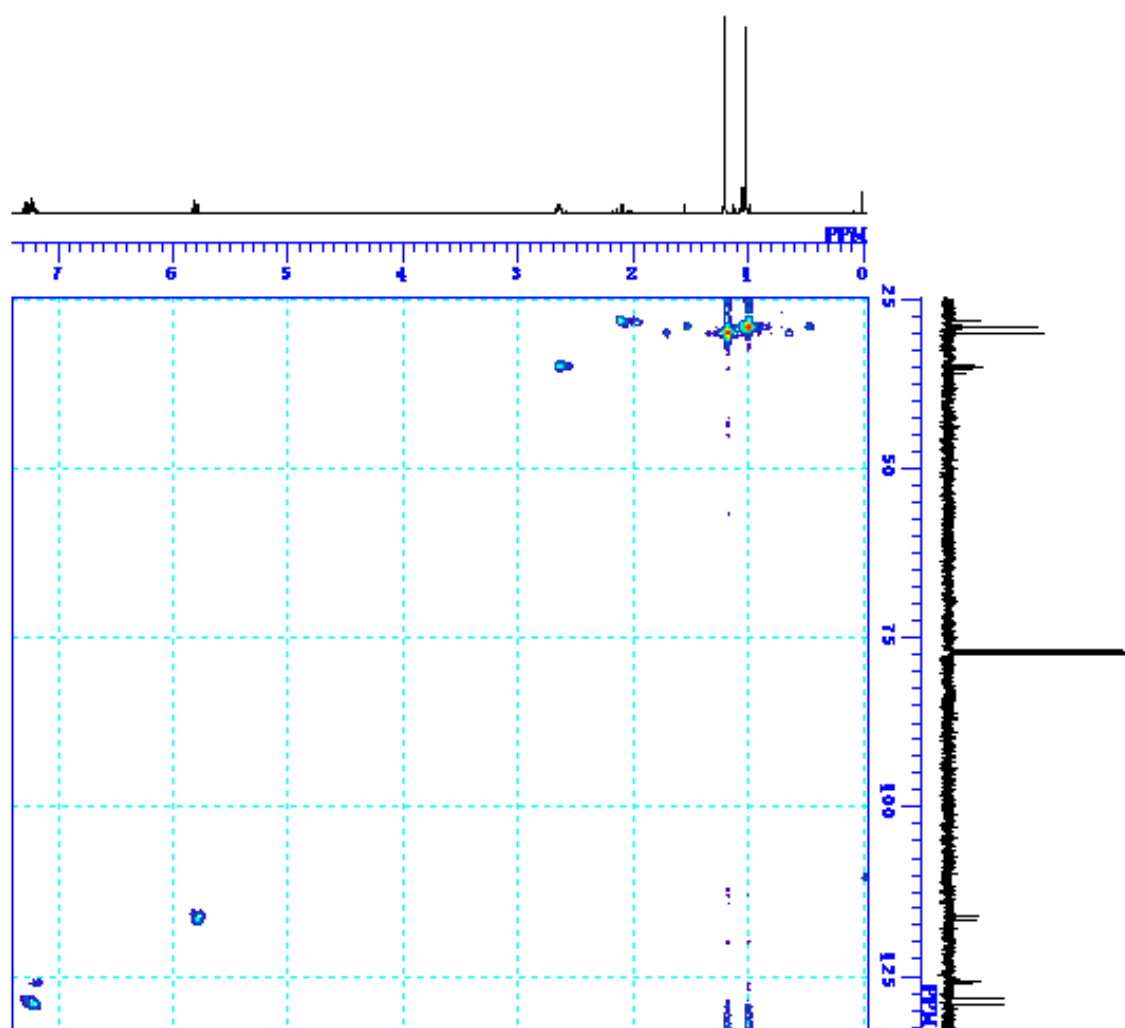

# HMBC

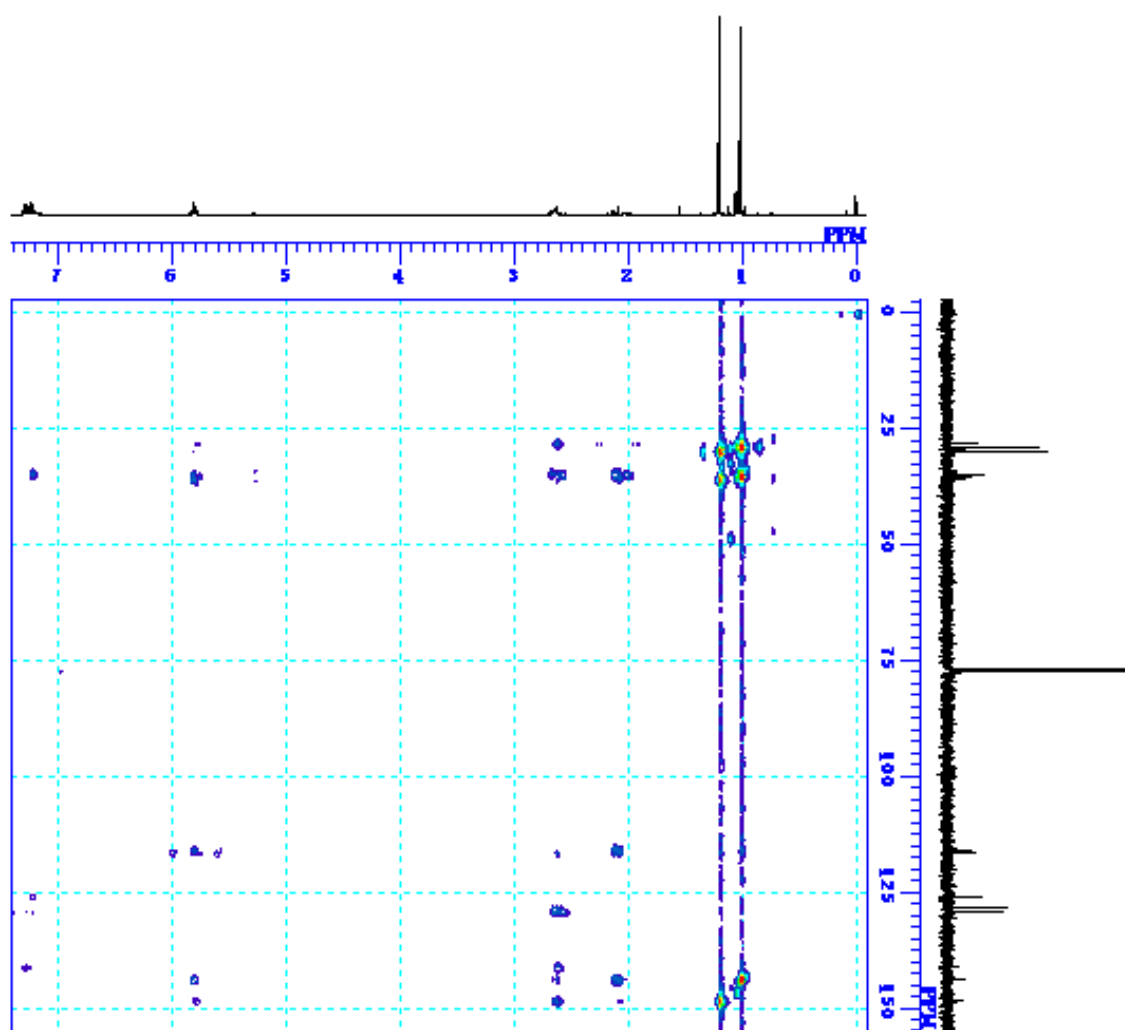

NOESY

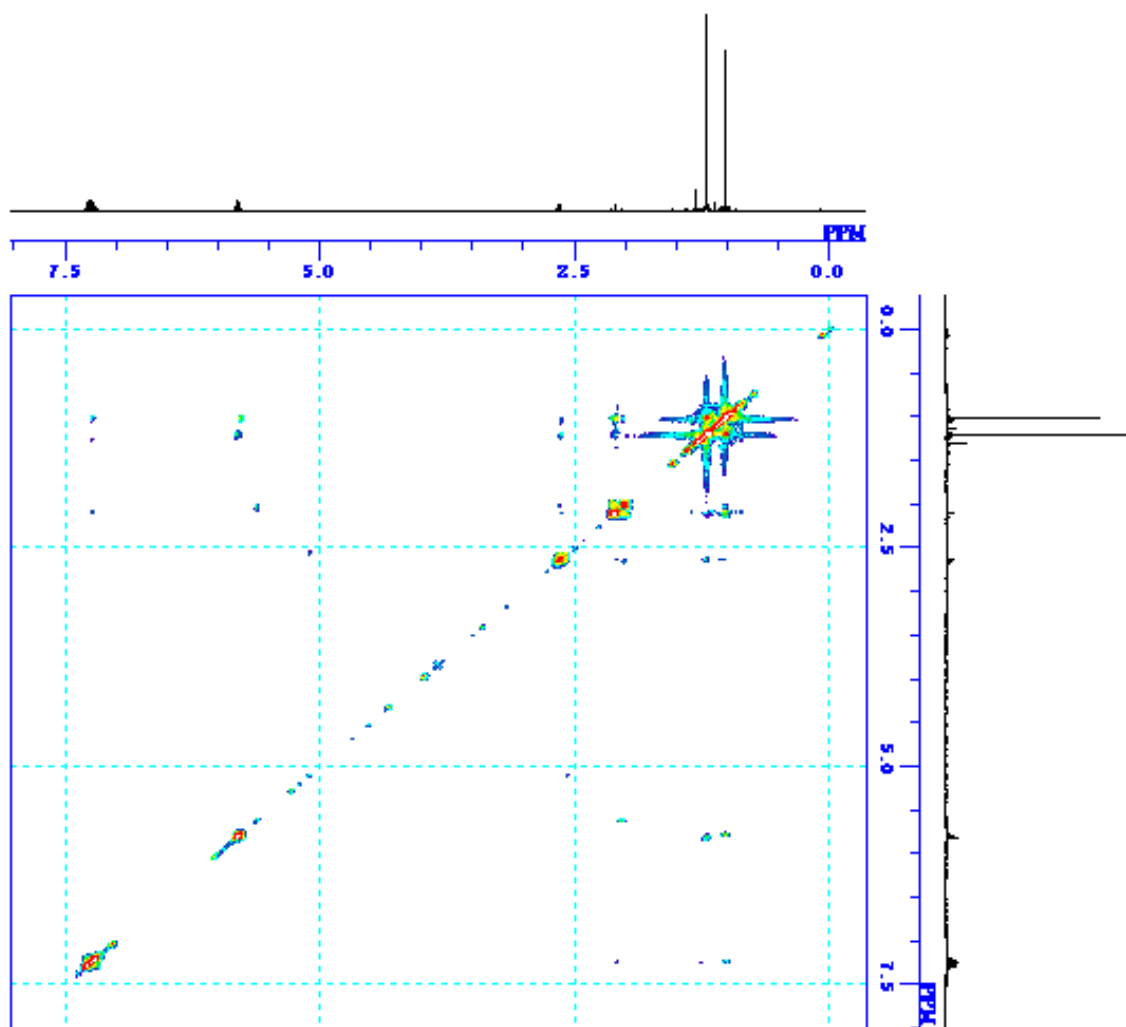

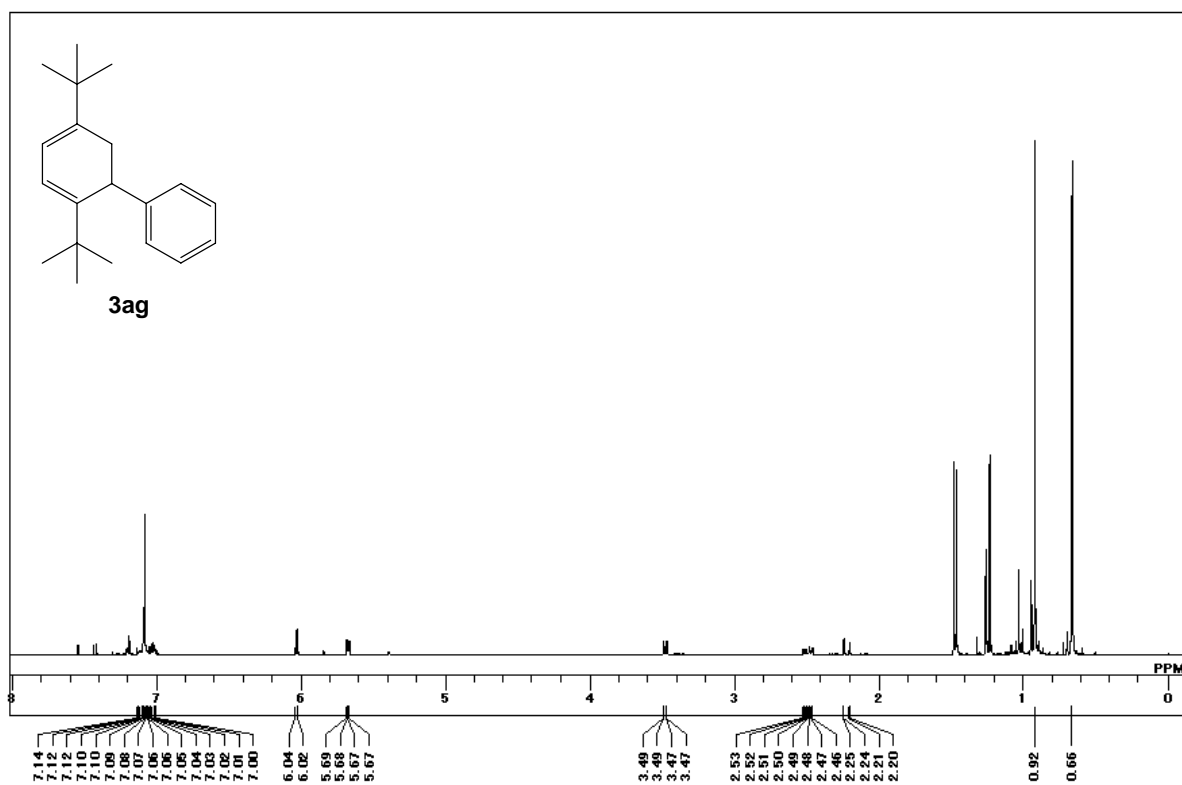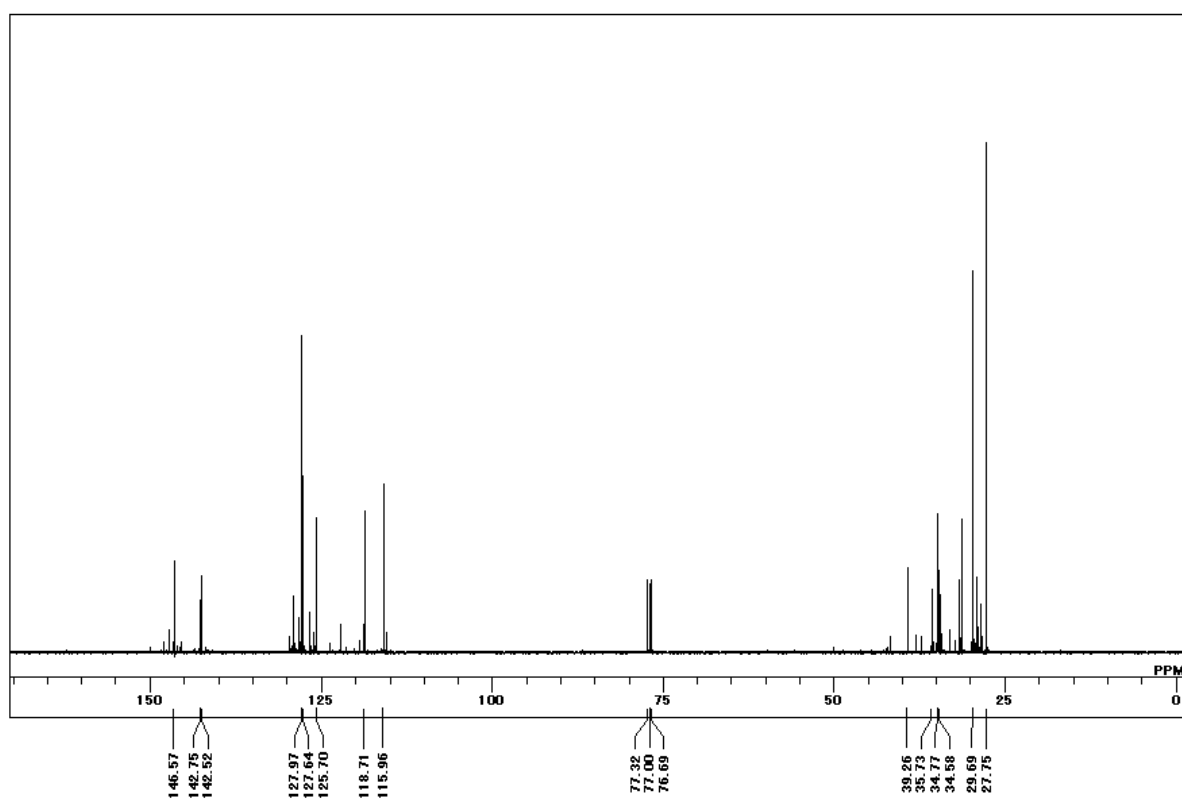

NOESY

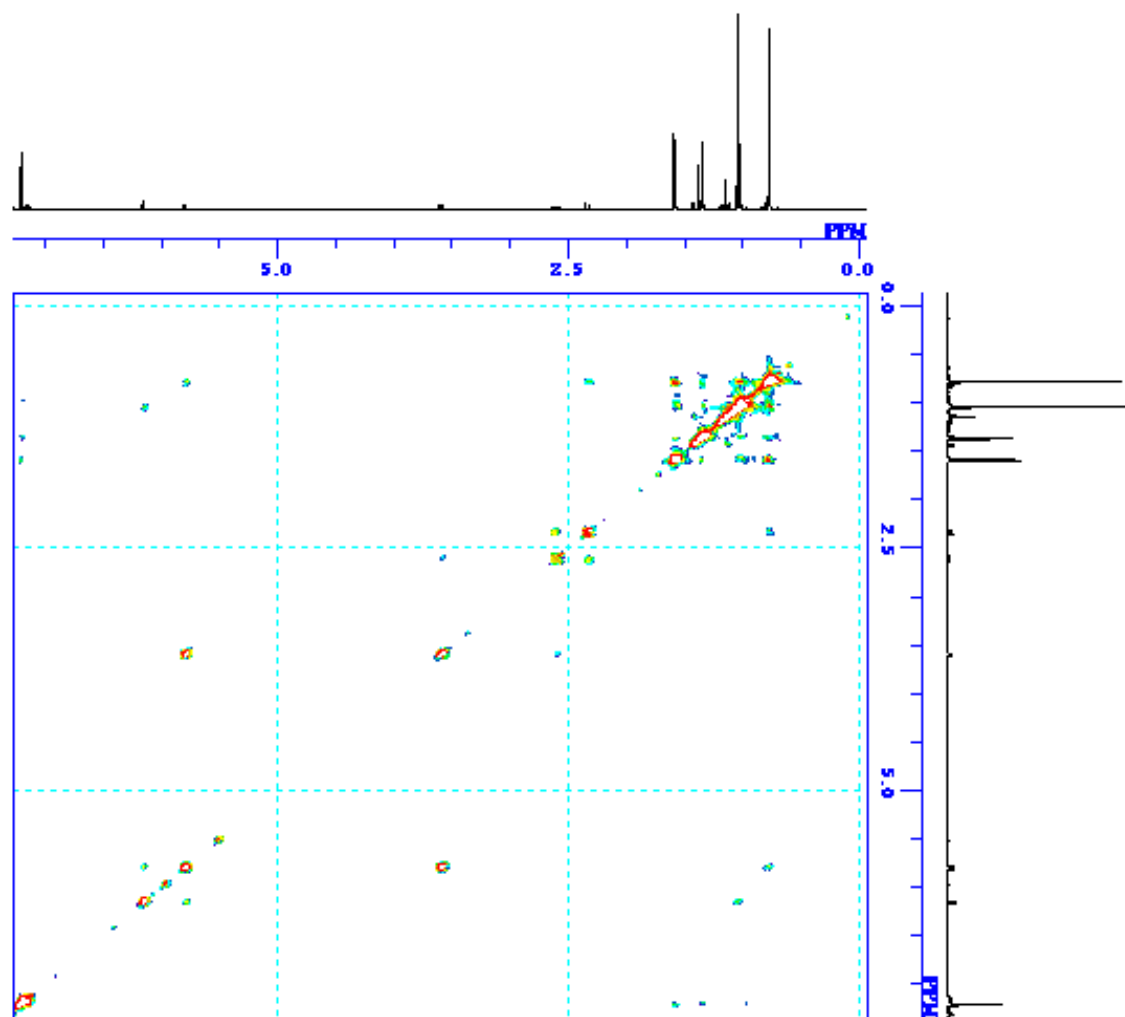



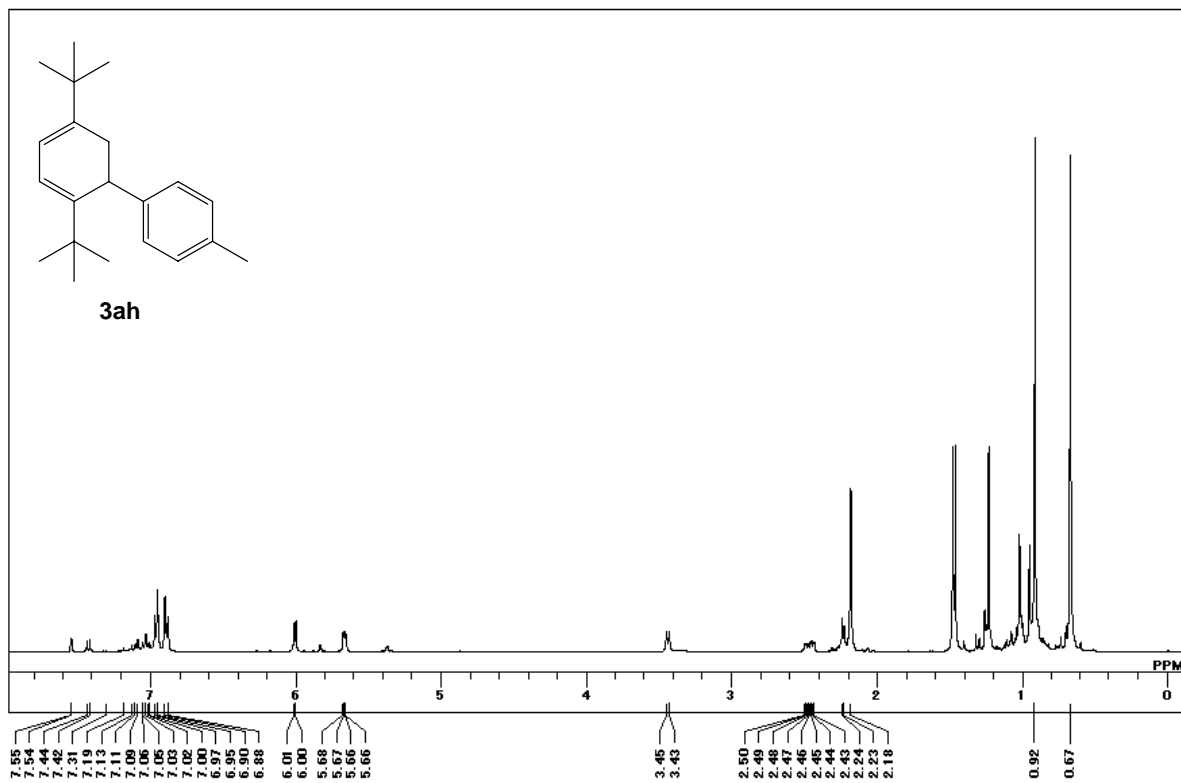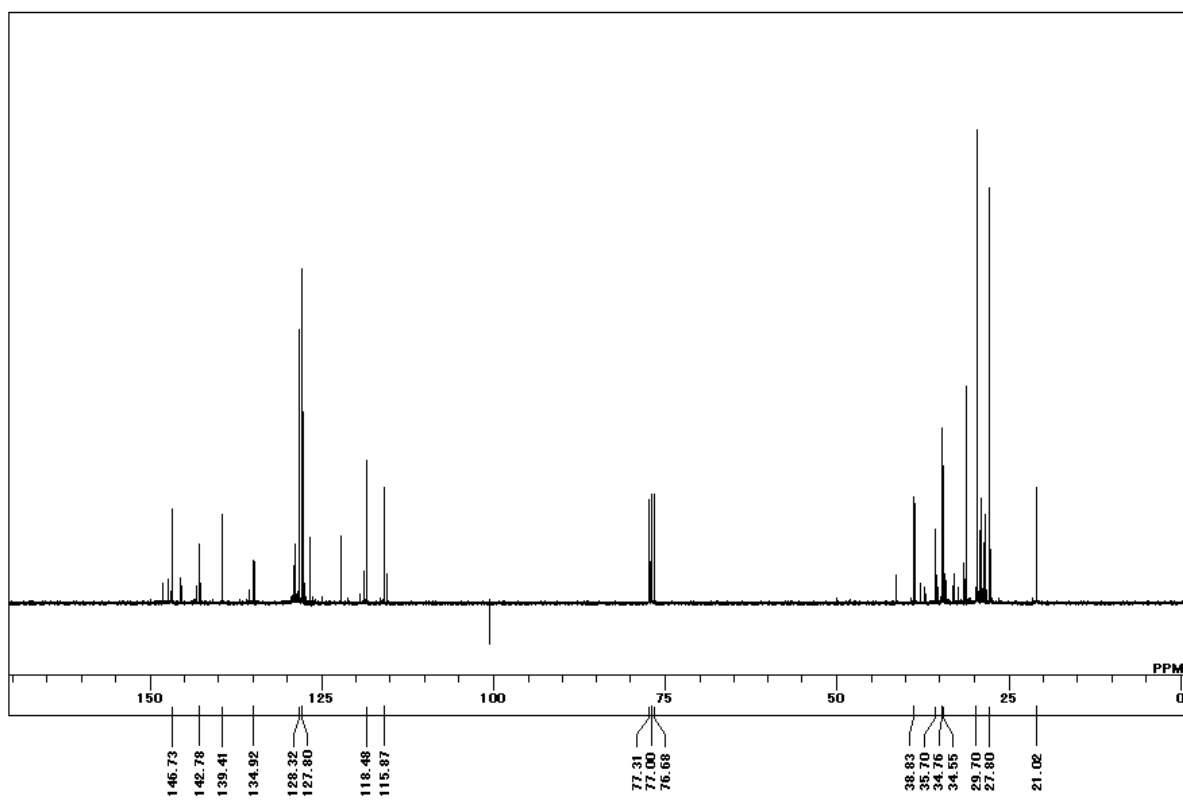

NOESY

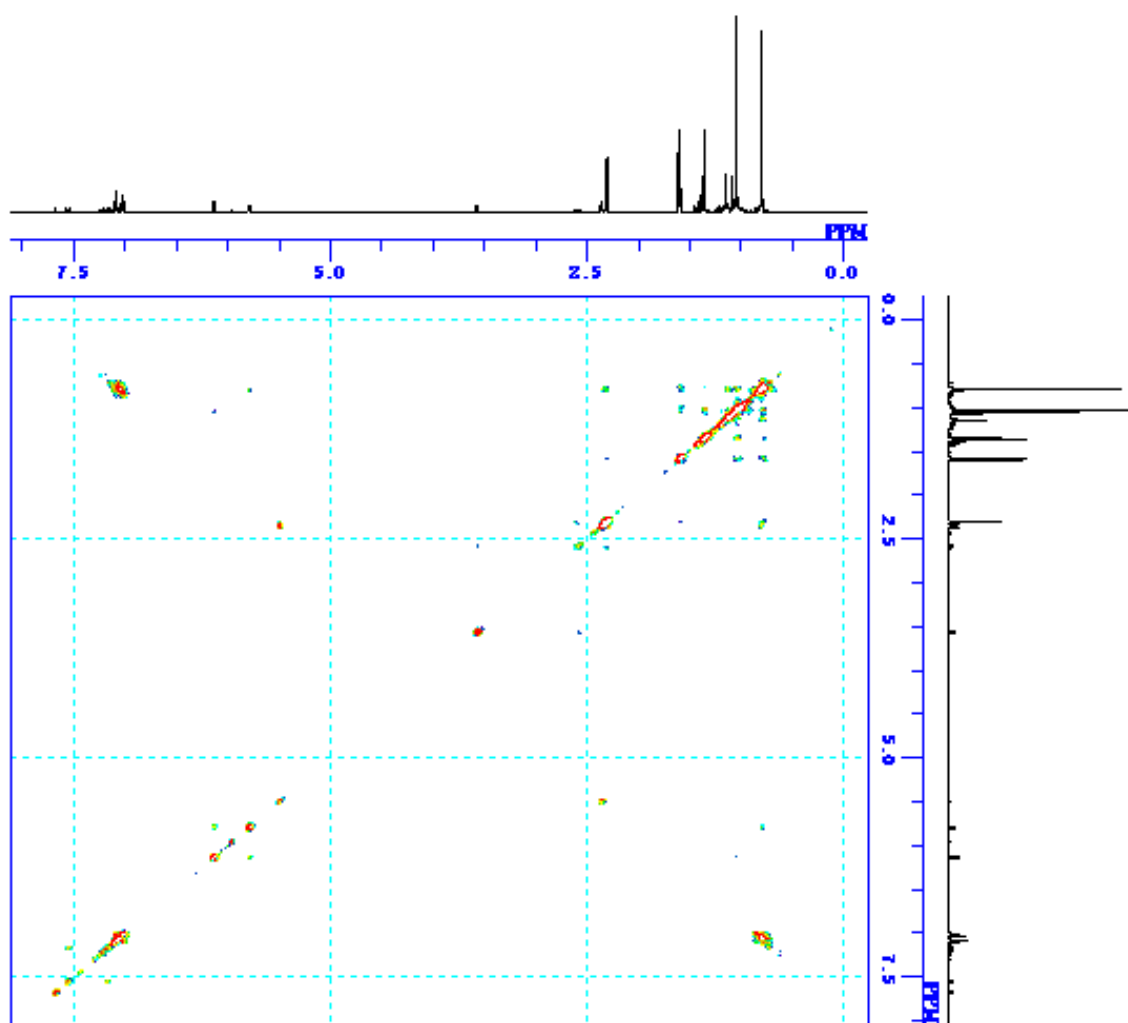

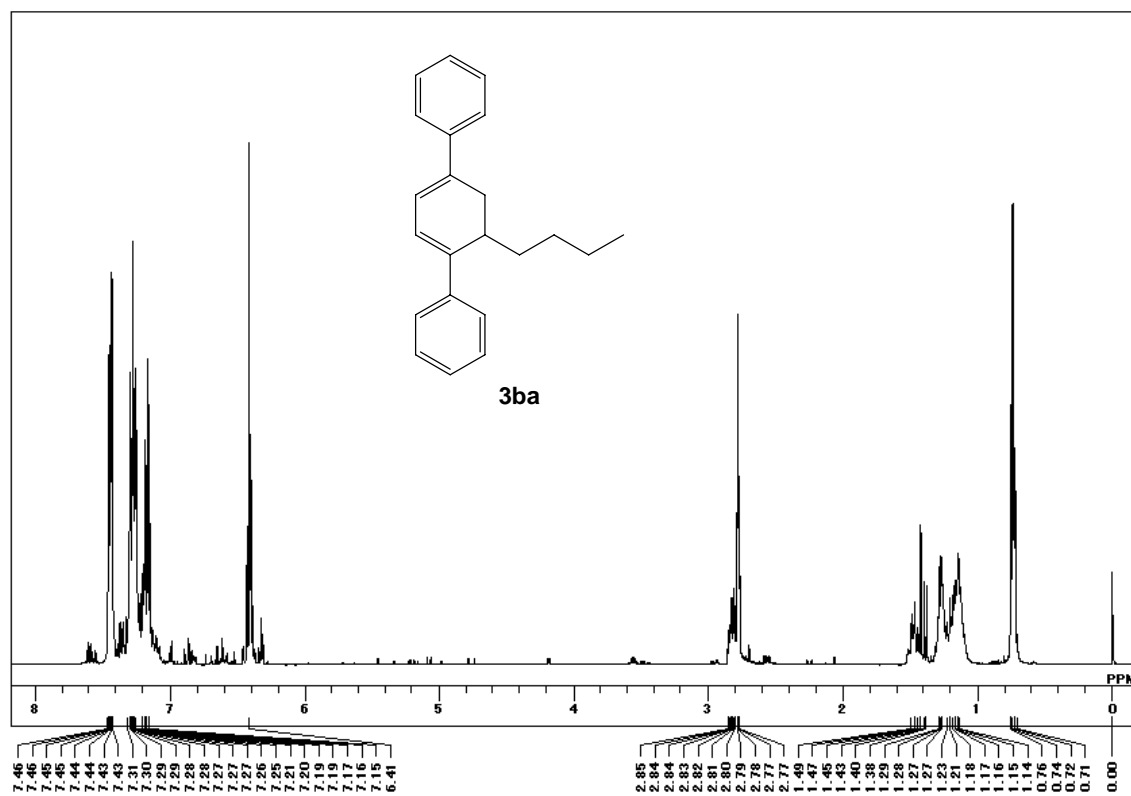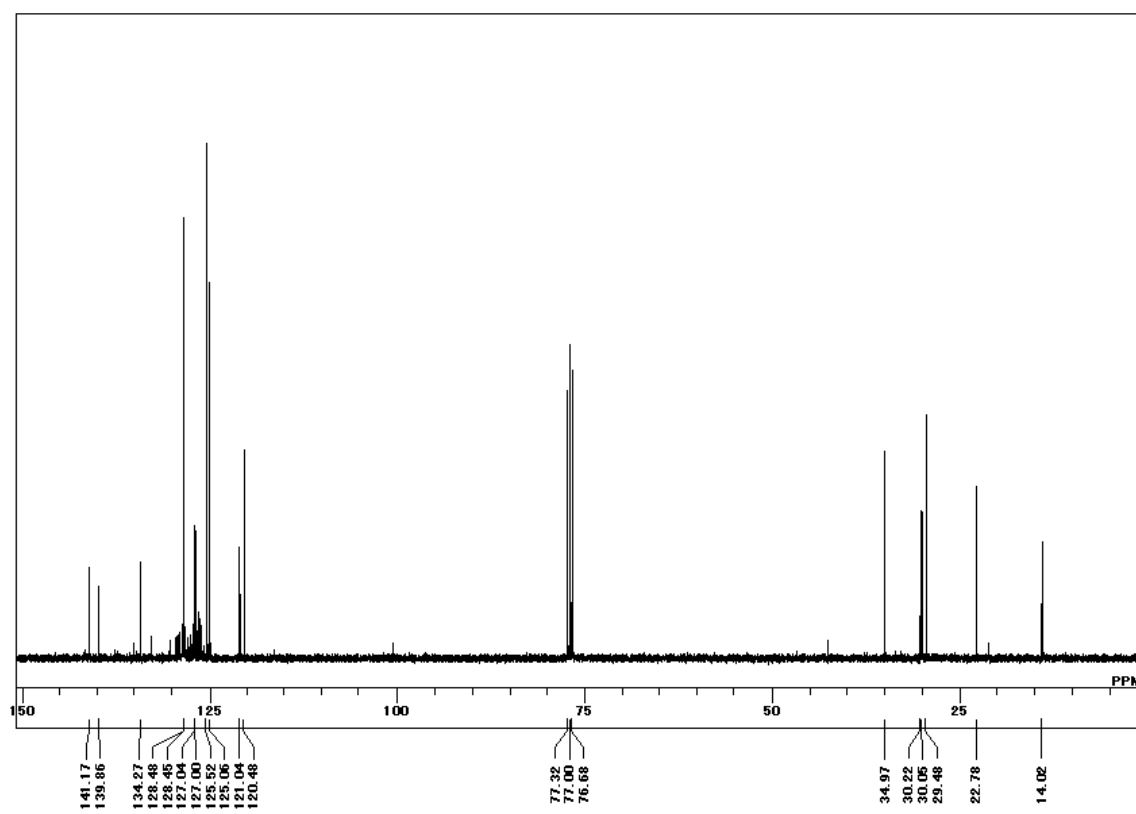

NOESY

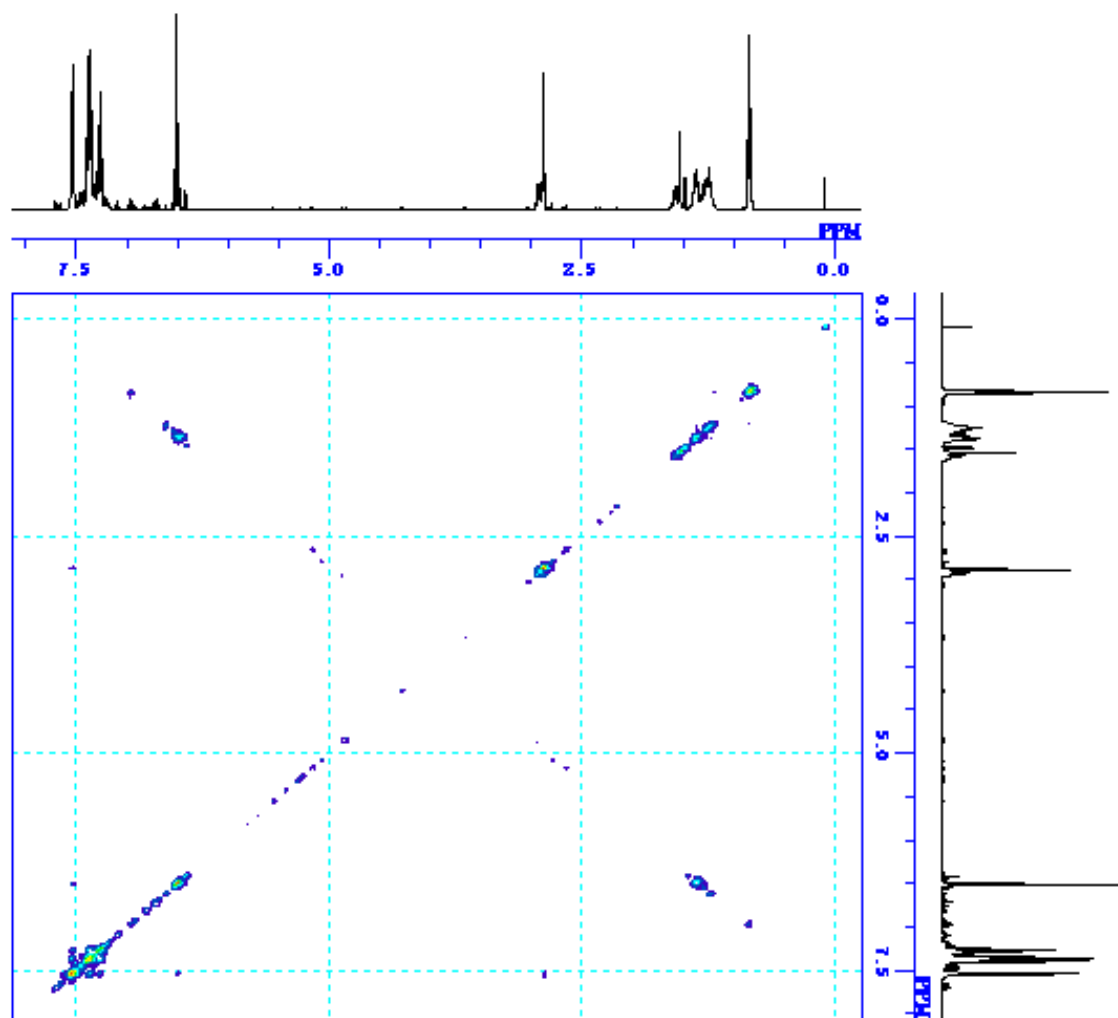

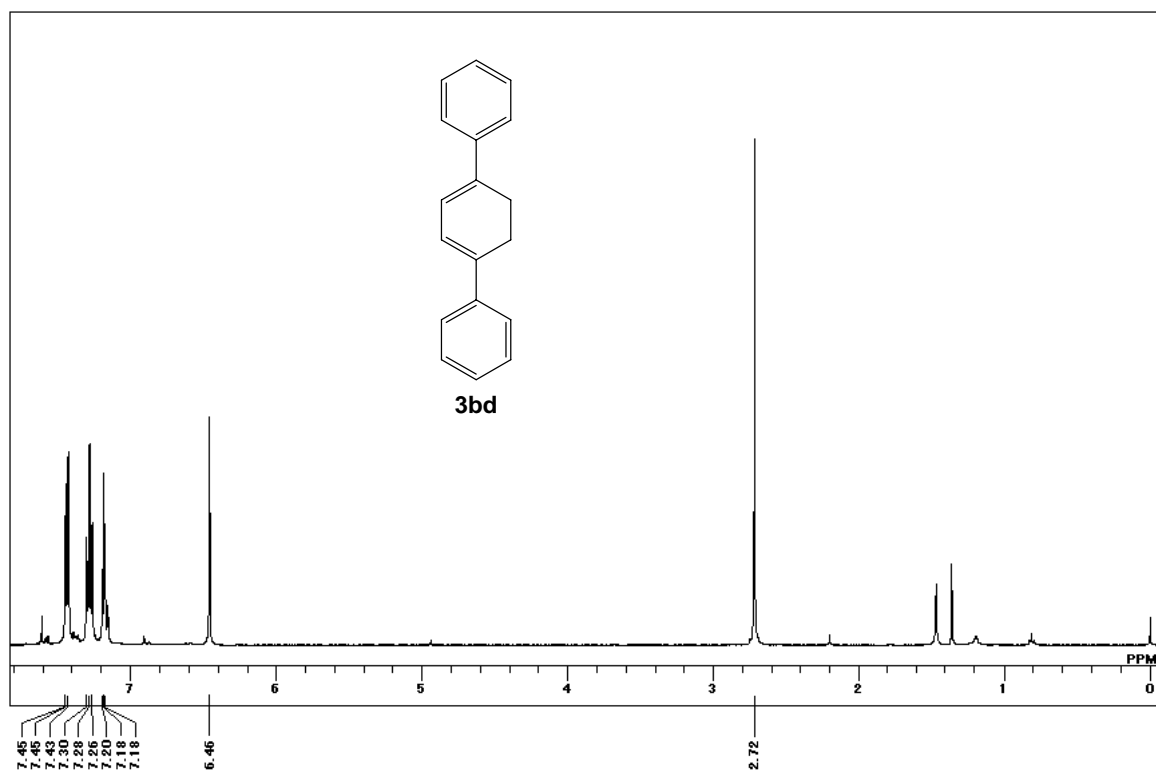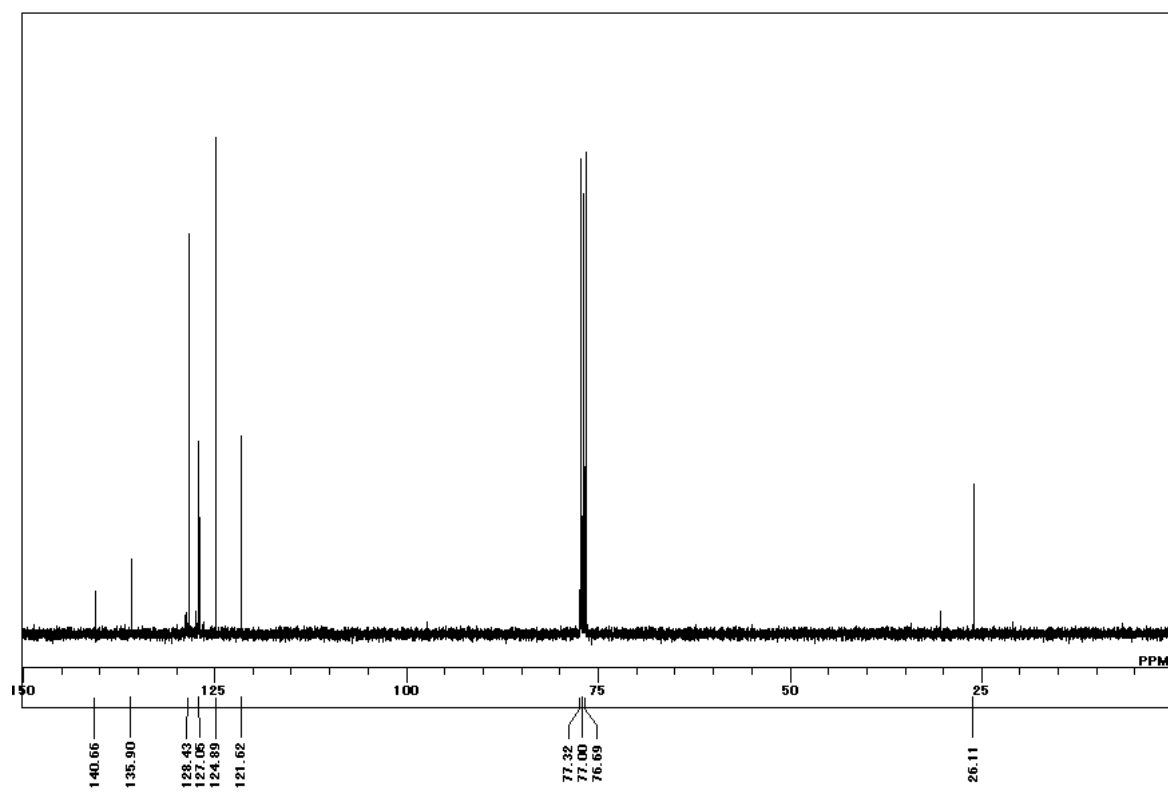

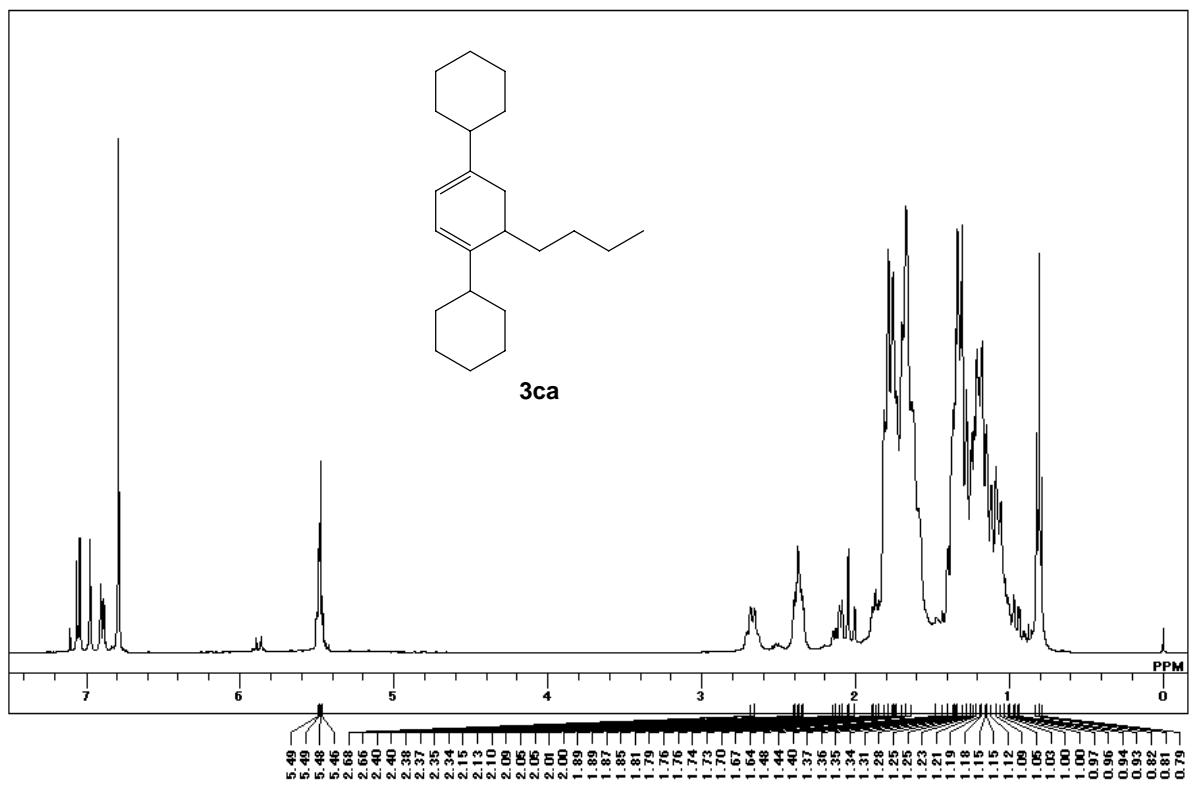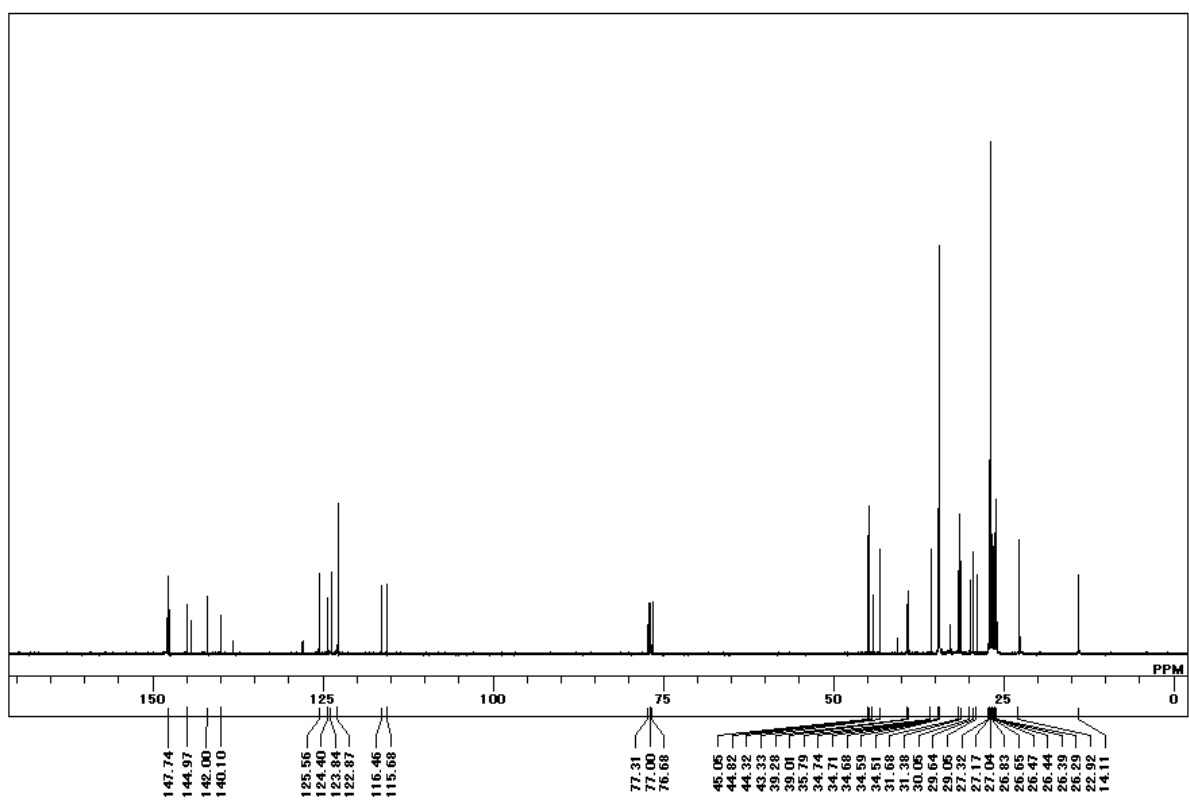

NOESY

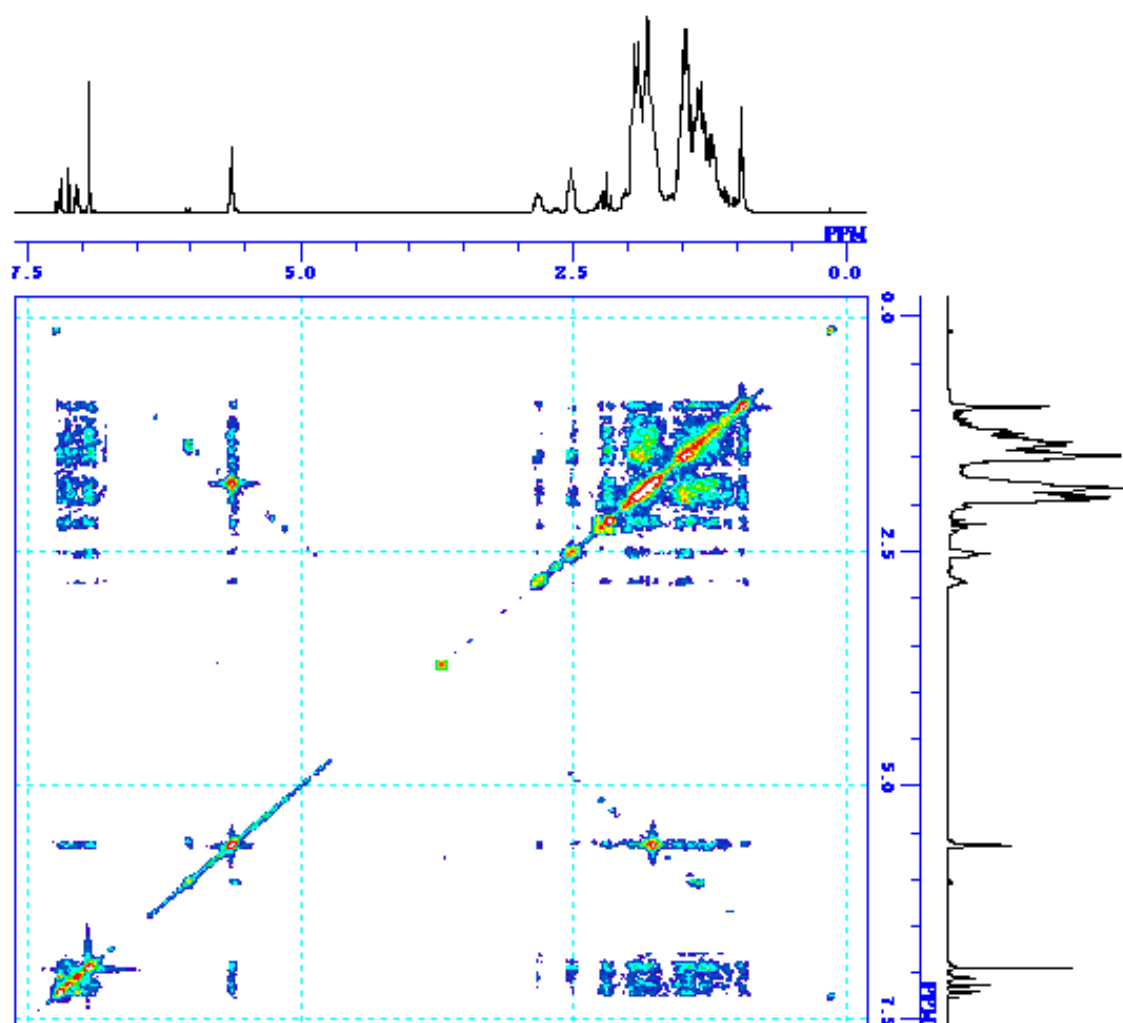

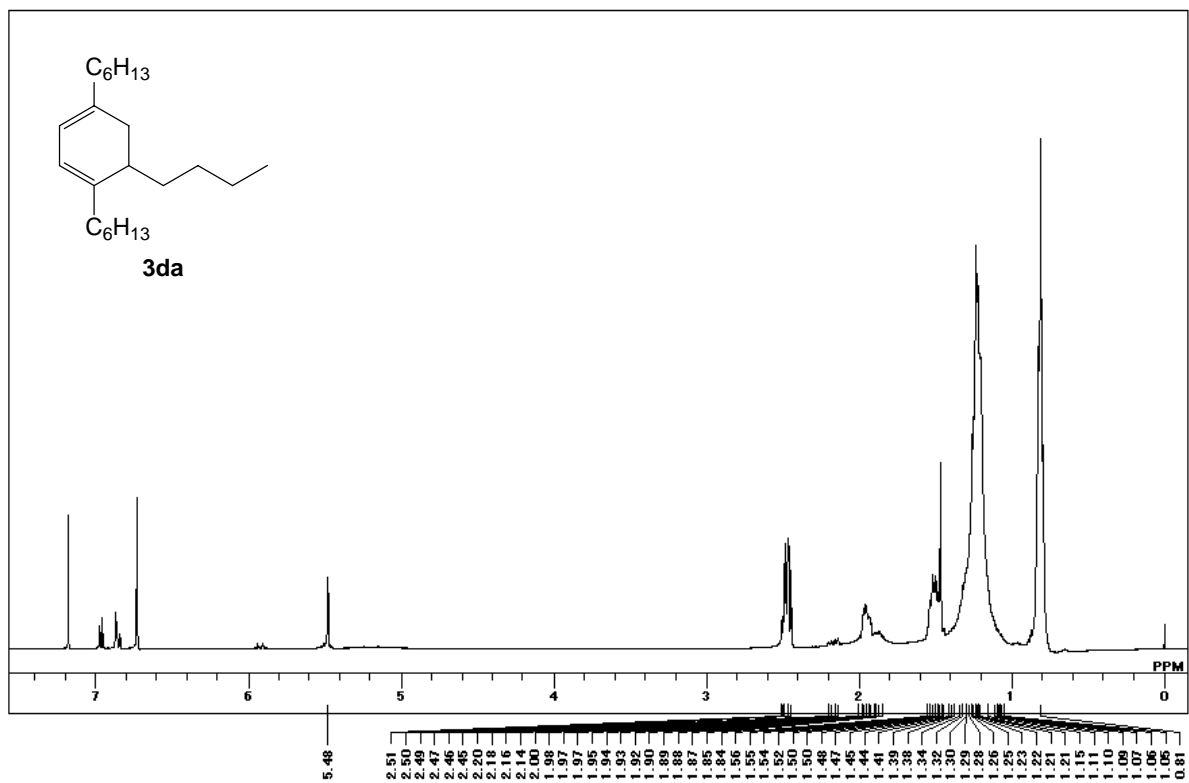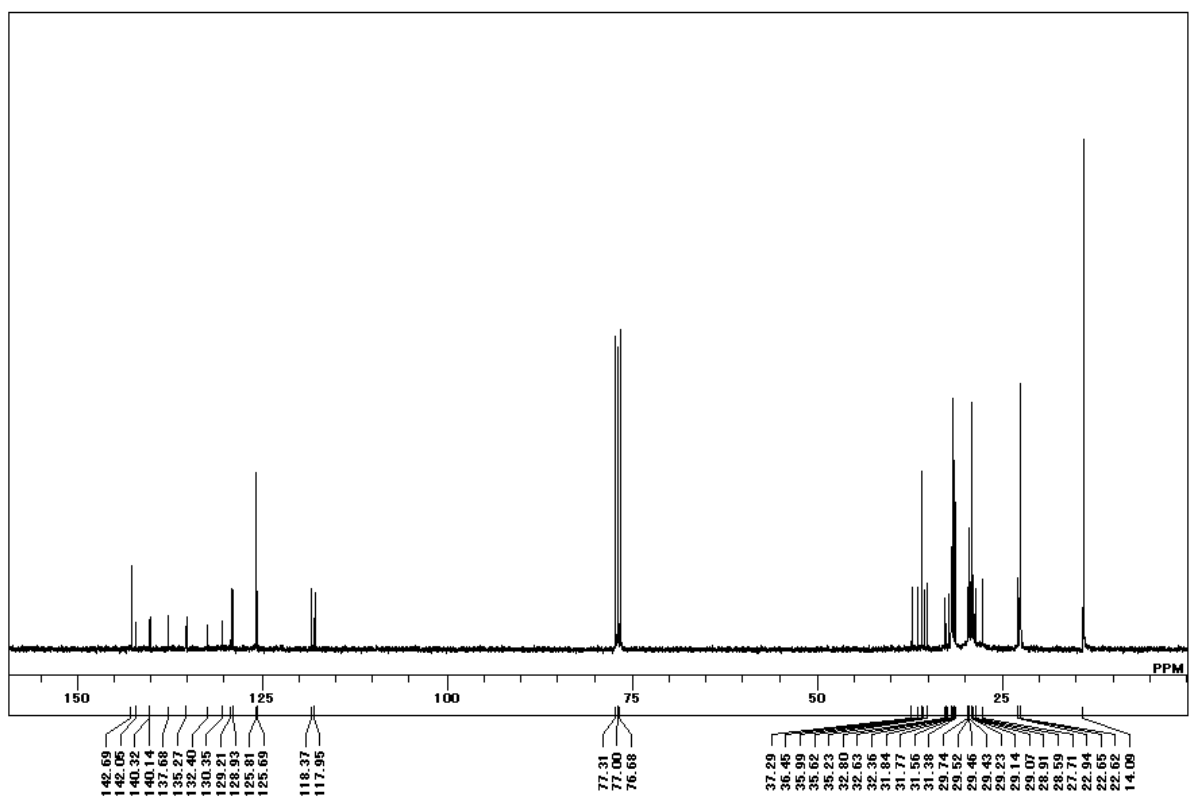



NOESY

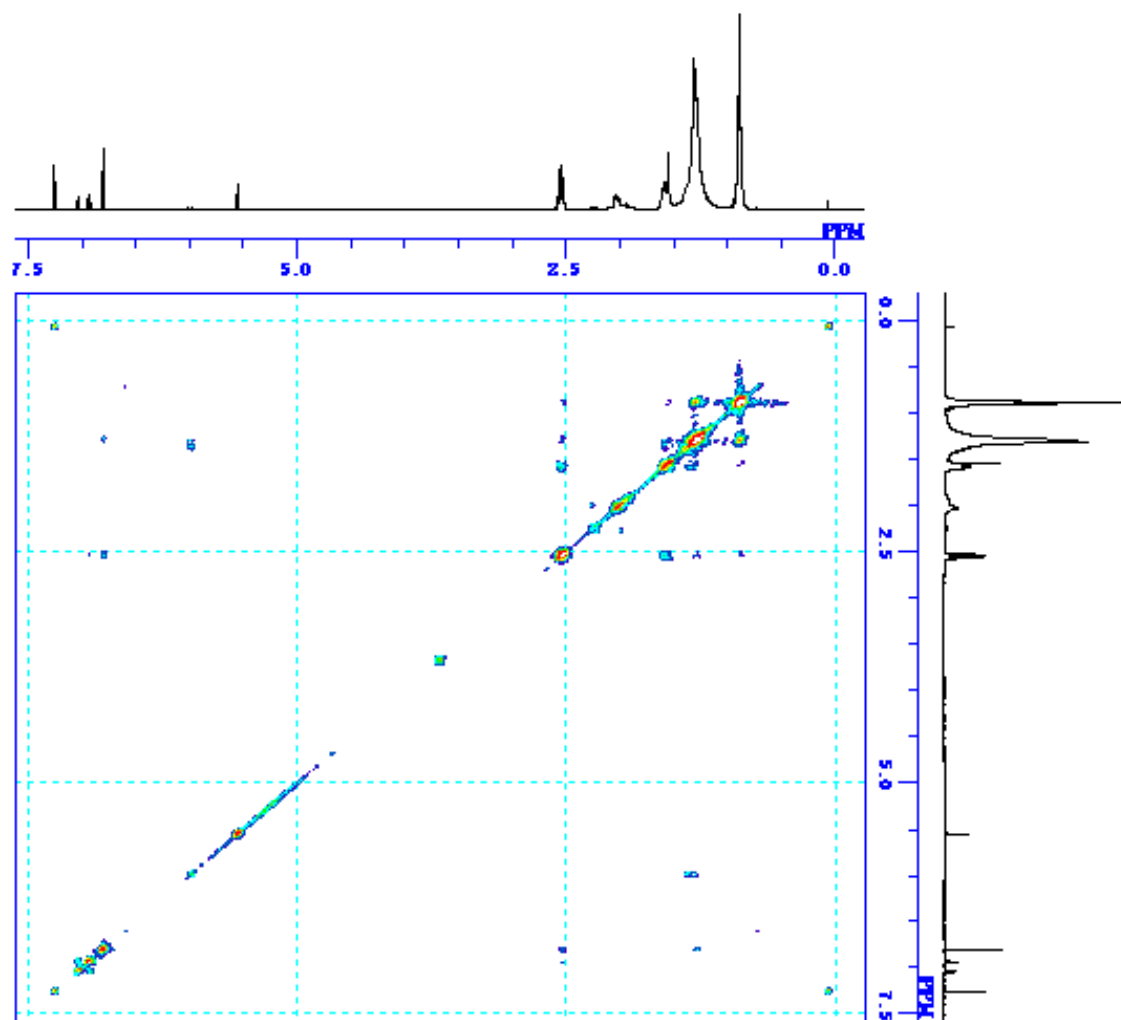

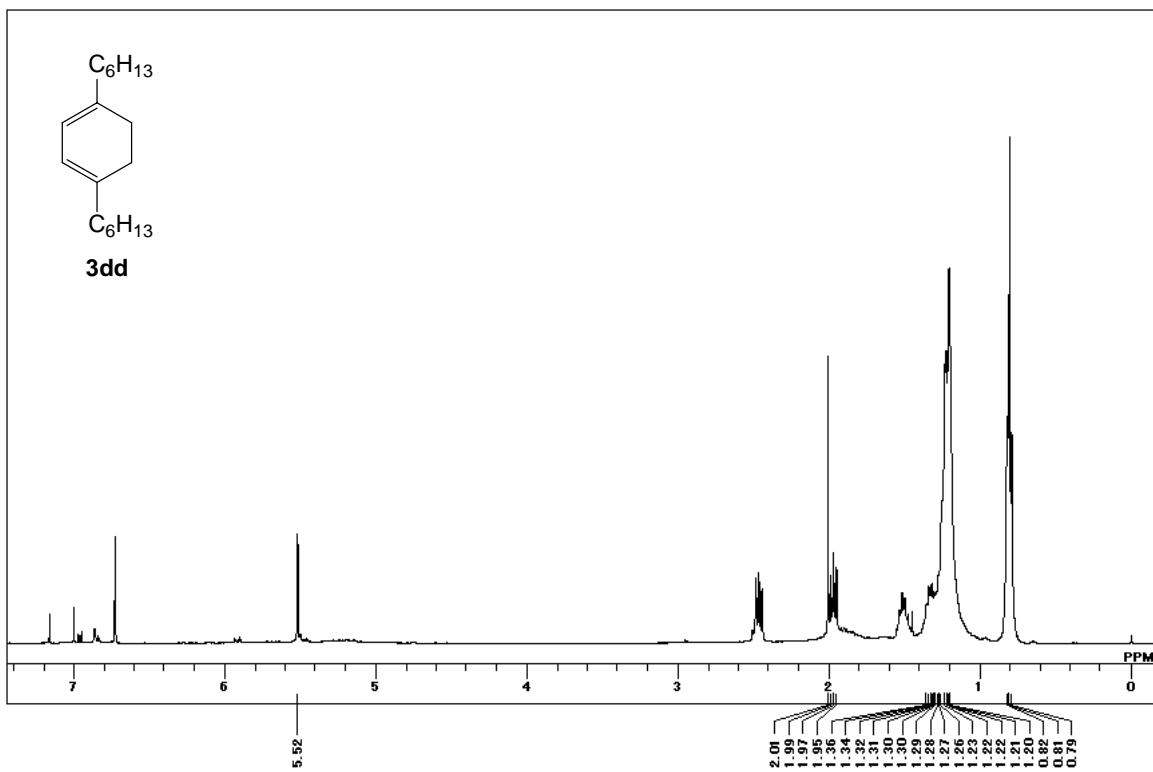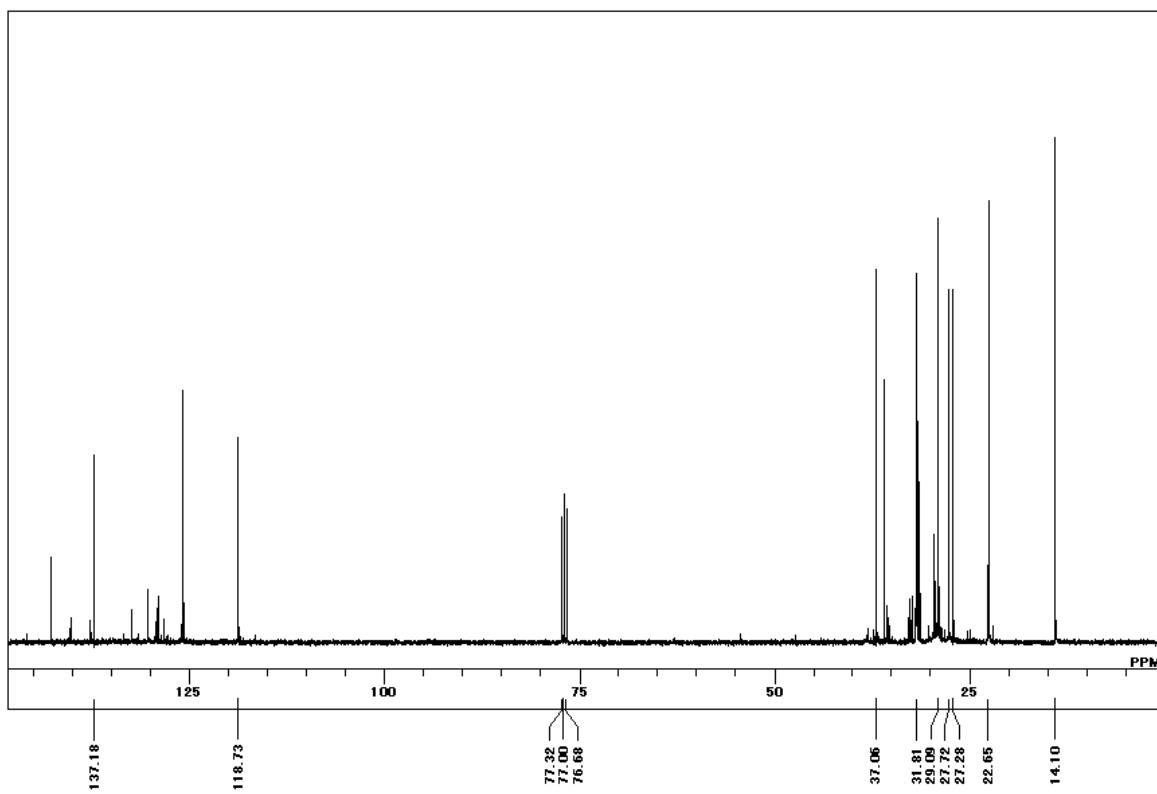

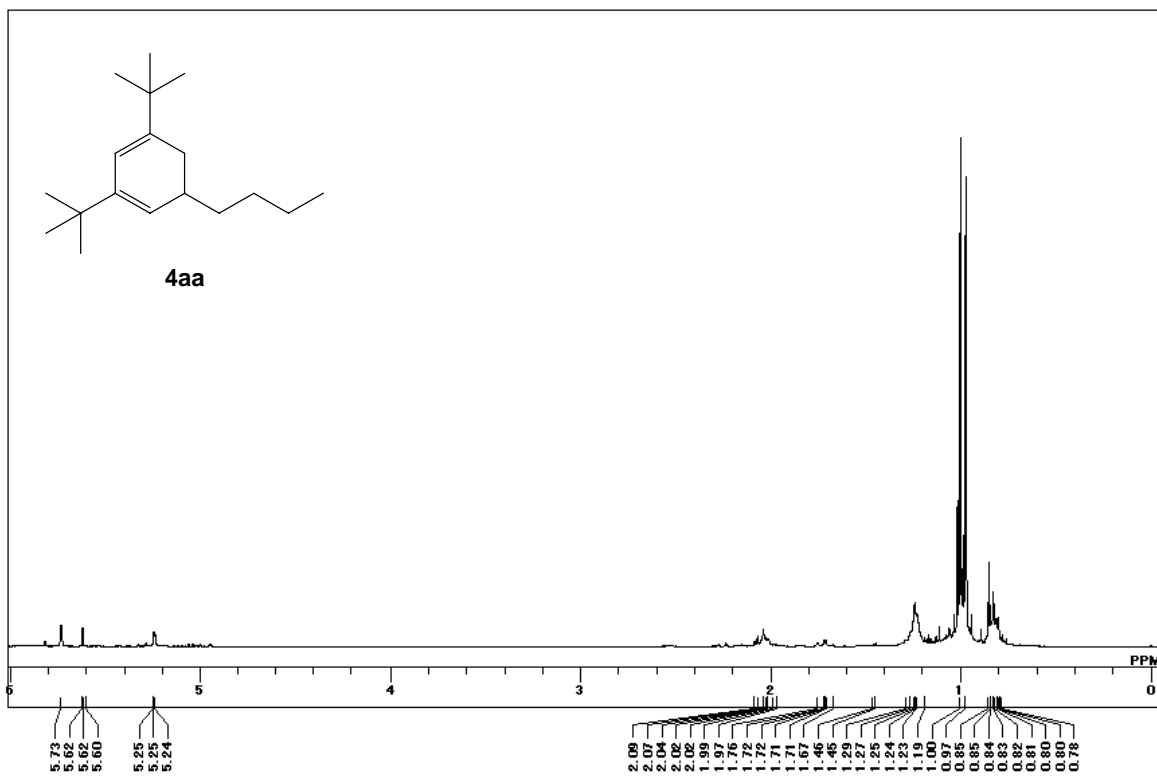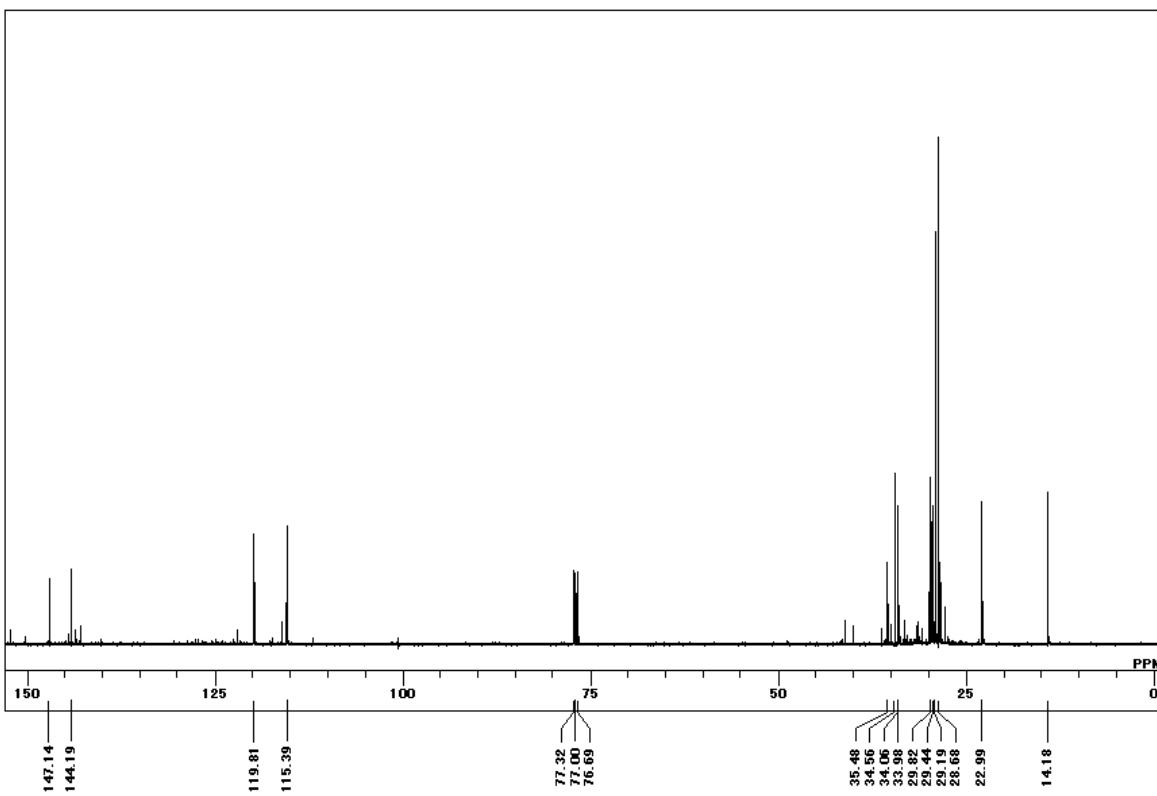

# HMQC

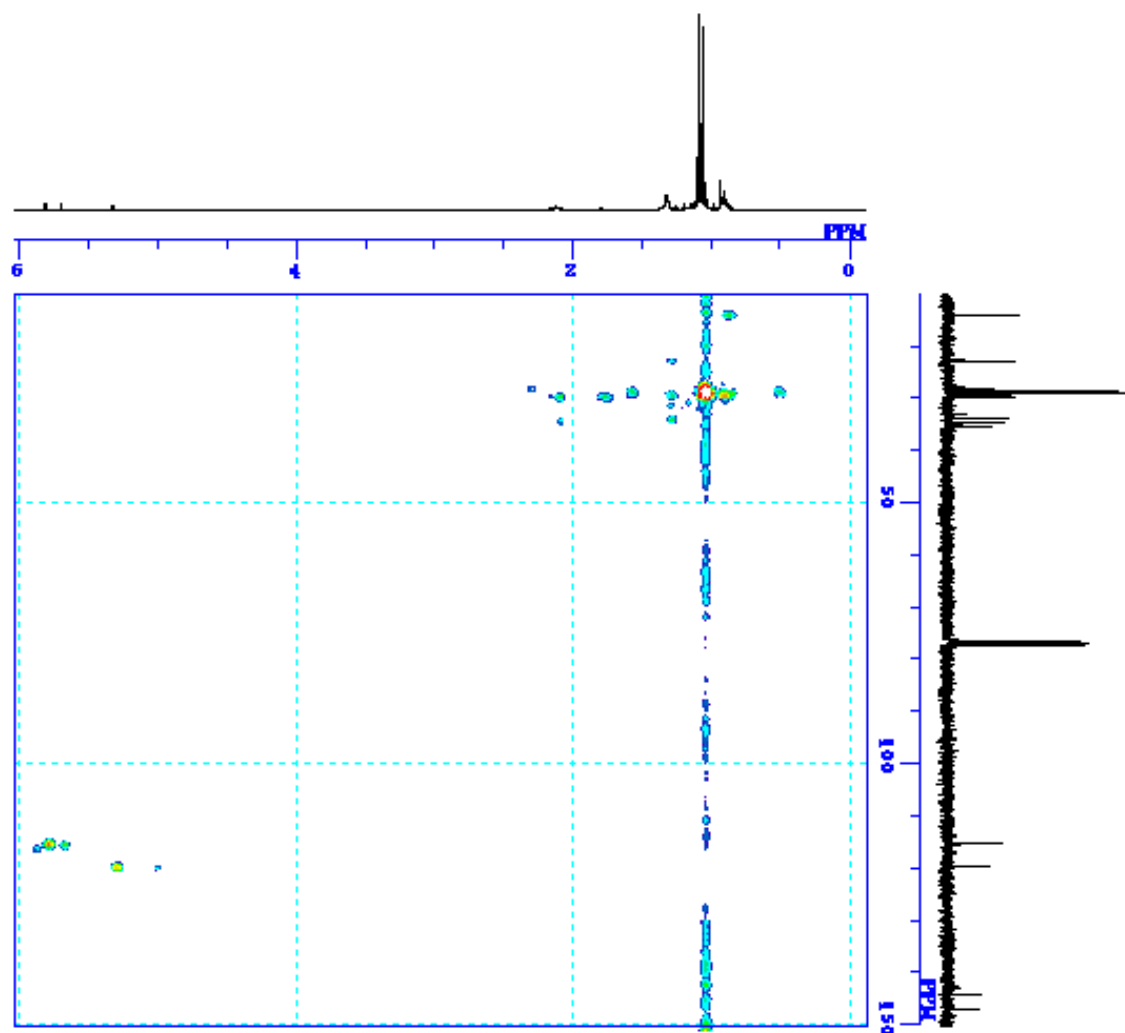

# HMBC

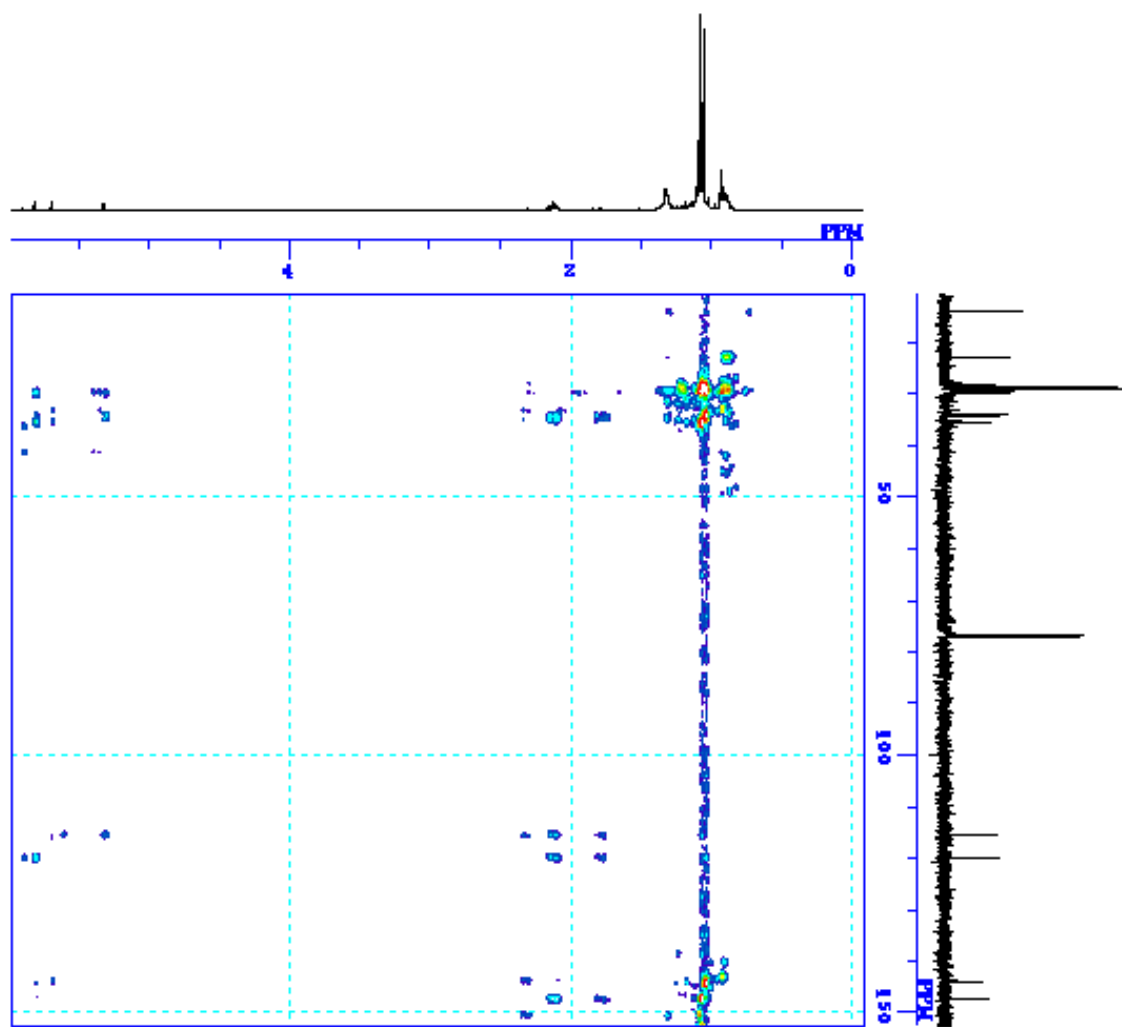

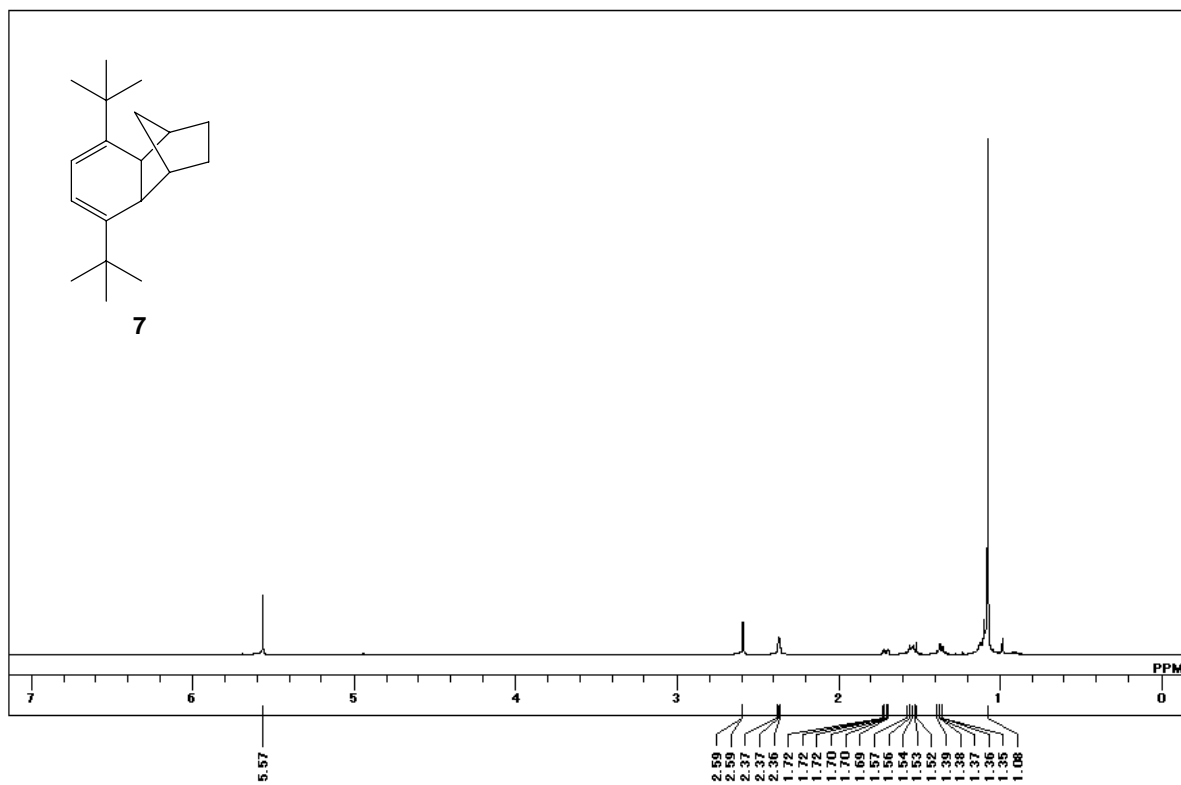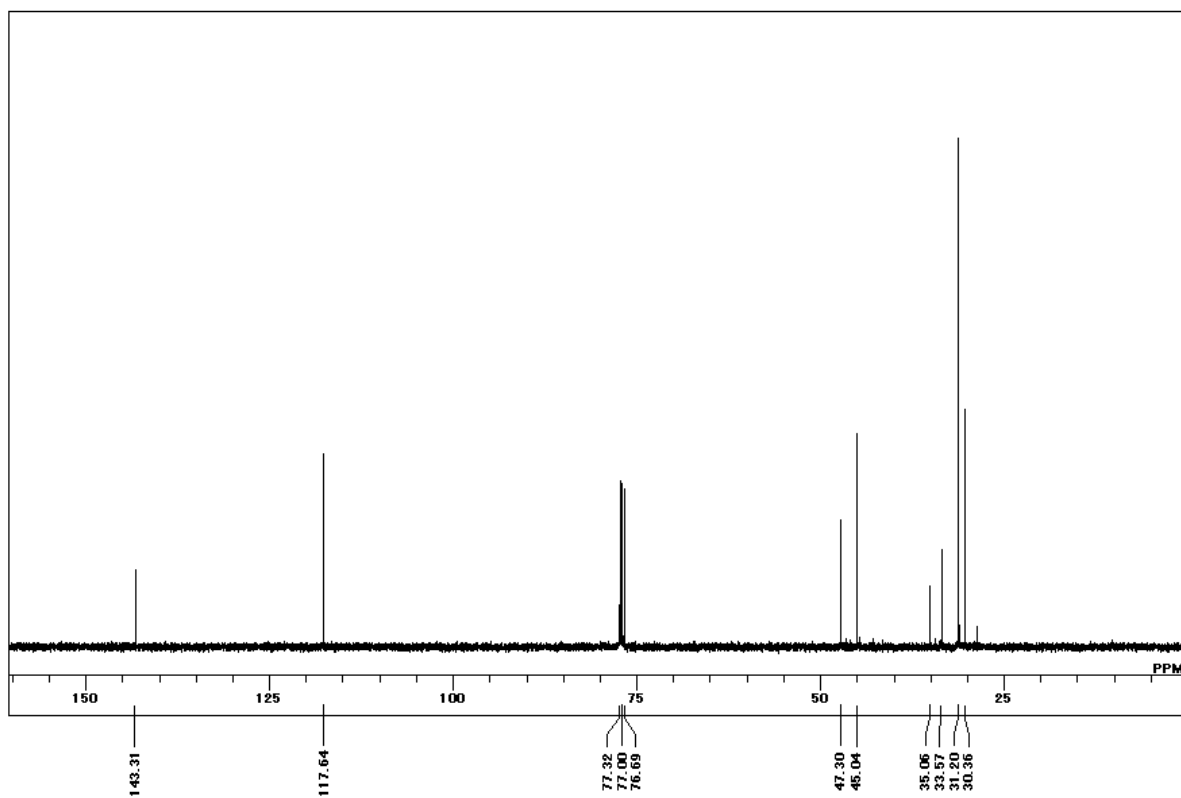

Supplement: b820352k.pdf [file b820352k.pdf]
